# Supplementary material for: Discovery of lead quinone cathode materials for Li-ion batteries
Source: Digit Discov. 2023 May 30;2(4):1016–25. doi: 10.1039/d2dd00112h (PMC10408572; doi:10.1039/d2dd00112h)
Supplement: DD-002-D2DD00112H-s001 [file DD-002-D2DD00112H-s001.csv]

#	SMILES	Molecular formula	Molecular weight	Theoretical gravimetric charge capacity (mAh/g)	B3LYP-based LUMO energy (eV)	Predicted B3LYP-based redox potential (vs Li/Li+)	Predicted B3LYP-based energy density (Wh/Kg)	SCScore value	RMSD value	VENDOR PAGE
1	Nc1ccc(N)c(c12)C(=O)c3c(C2=O)c(N)ccc3N	C14H12N4O2	268.277	199.800952	-0.08907	1.748298456	349.3116959	2.209785235	0.1615	http://zinc.docking.org/substances/ZINC000003861518/catitems/subsets/for-sale/table.html
2	Cc1c(C)c(C)c(C)c(c12)C(=O)c3c(C2=O)c(C)c(C)c(C)c3C	C22H24O2	320.435	167.2788553	-0.09049	1.775501149	297.0037997	2.352470515	0.1967	http://zinc.docking.org/substances/ZINC000005378130/catitems/subsets/for-sale/table.html
3	COc1ccc(OC)c2C(=O)C(=O)c(c3c12)c(OC)ccc3OC	C18H16O6	328.325	163.258966	-0.09177	1.800021885	293.8697118	2.098751023	0.1599
4	O=C1C(N)=C(N)C(=O)c(c12)c(N)ccc2N	C10H10N4O2	218.217	245.6362245	-0.09402	1.843124743	452.7382031	2.179207327	0.0793
5	c1c(N)ccc(c12)C(=O)c3c(C2=O)ccc(c3)N	C14H10N2O2	238.248	224.9840502	-0.09471	1.856342953	417.647556	2.008275106	0.0486	http://zinc.docking.org/substances/ZINC000003874039/catitems/subsets/for-sale/table.html
6	Nc1ccc(N)c(c12)C(=O)c3c(C2=O)c(N)ccc3	C14H11N3O2	253.263	211.6456016	-0.09578	1.876840756	397.2250909	2.483987477	0.1282	http://zinc.docking.org/substances/ZINC000004552383/catitems/subsets/for-sale/table.html
7	Nc1ccc(N)c(c1c23)C(=O)C(=O)c2c(N)ccc3N	C14H12N4O2	268.277	199.800952	-0.09631	1.886993874	377.0231724	2.151660513	1.1465
8	c1c(N)ccc(c12)C(=O)c3c(C2=O)cc(N)cc3	C14H10N2O2	238.248	224.9840502	-0.09687	1.897721696	426.9571133	2.008275106	0.0556	http://zinc.docking.org/substances/ZINC000031483469/catitems/subsets/for-sale/table.html
9	c1c(N)ccc(c12)C(=O)C(N)=C(C2=O)N	C10H9N3O2	203.202	263.7867738	-0.09841	1.927223207	508.3759922	2.458263067	0.0685	http://zinc.docking.org/substances/ZINC000075603053/catitems/subsets/for-sale/table.html
10	c1c(N)ccc(c1c23)C(=O)C(=O)c2ccc(c3)N	C14H10N2O2	238.248	224.9840502	-0.0986	1.930863004	434.4133791	2.19402545	0.041
11	COc1cc(OC)cc(c12)C(=O)c3c(C2=O)c(OC)cc(c3)OC	C18H16O6	328.325	163.258966	-0.09861	1.931054572	315.2619728	2.590428544	0.0704	http://zinc.docking.org/substances/ZINC000004667578/catitems/subsets/for-sale/table.html
12	Nc1cccc(c12)C(=O)c3c(C2=O)cc(N)cc3	C14H10N2O2	238.248	224.9840502	-0.09949	1.947912579	438.2492614	2.74258799	0.0658	http://zinc.docking.org/substances/ZINC000149090667/catitems/subsets/for-sale/table.html
13	Nc1cccc(c12)C(=O)c3c(C2=O)ccc(c3)N	C14H10N2O2	238.248	224.9840502	-0.10062	1.969559792	443.1195391	2.74258799	0.0641	http://zinc.docking.org/substances/ZINC000004522754/catitems/subsets/for-sale/table.html
14	COc1cccc(c12)c3c(C(=O)C2=O)c(OC)ccc3	C16H12O4	268.272	199.8046759	-0.10071	1.971283906	393.871742	2.16317865	0.1642
15	Nc1cc(N)cc(c12)C(=O)c3c(C2=O)cccc3	C14H10N2O2	238.248	224.9840502	-0.10076	1.972241747	443.7229363	2.869921358	0.0671	http://zinc.docking.org/substances/ZINC000003880344/catitems/subsets/for-sale/table.html
16	Nc1ccc(N)c(c12)C(=O)c3c(C2=O)cccc3	C14H10N2O2	238.248	224.9840502	-0.10122	1.981053887	445.7055272	2.223363543	0.1045	http://zinc.docking.org/substances/ZINC000003902902/catitems/subsets/for-sale/table.html
17	COc(c1)c(OC)cc(c12)C(=O)c3c(C2=O)cc(OC)c(c3)OC	C18H16O6	328.325	163.258966	-0.10188	1.993697392	325.4889748	2.736670476	0.0436	http://zinc.docking.org/substances/ZINC000014628744/catitems/subsets/for-sale/table.html
18	COc1ccc(OC)c(c12)C(=O)c3c(C2=O)c(OC)ccc3OC	C18H16O6	328.325	163.258966	-0.10221	2.000019145	326.5210575	2.076349306	0.371	http://zinc.docking.org/substances/ZINC000006127508/catitems/subsets/for-sale/table.html
19	COc1cccc(c12)C(=O)c3c(C2=O)cccc3OC	C16H12O4	268.272	199.8046759	-0.10222	2.000210713	399.6514532	2.309626071	0.0571	http://zinc.docking.org/substances/ZINC000004783243/catitems/subsets/for-sale/table.html
20	c12c3c4c(=O)c(=O)c1c(N)ccc2ccc3ccc4N	C16H10N2O2	262.27	204.3771686	-0.10239	2.003467373	409.4629891	1.947173367	0.0347
21	COc1c(OC)c(OC)cc(c12)C(=O)c3c(C2=O)cc(OC)c(c3)OC	C19H18O7	358.351	149.5796021	-0.10254	2.006340897	300.1076731	3.27277352	0.1087	http://zinc.docking.org/substances/ZINC000105658735/catitems/subsets/for-sale/table.html
22	Cc1ccc(C)c2C(=O)C(=O)c(c3c12)c(C)ccc3C	C18H16O2	264.327	202.7866998	-0.10281	2.01151324	407.9081315	2.087743579	0.7266
23	O=C1C(N)=C(N)C(=O)c(c12)cccc2N	C10H9N3O2	203.202	263.7867738	-0.10287	2.012662649	530.9137871	2.355835339	0.0911	http://zinc.docking.org/substances/ZINC000039298364/catitems/subsets/for-sale/table.html
24	COc1cccc(c12)C(=O)c3c(C2=O)c(OC)ccc3	C16H12O4	268.272	199.8046759	-0.10308	2.016685583	402.9432093	2.20640729	0.1696	http://zinc.docking.org/substances/ZINC000004748495/catitems/subsets/for-sale/table.html
25	c1c(N)ccc(c12)C(N)=CC(=O)C2=O	C10H8N2O2	188.187	284.8337026	-0.1033	2.020900084	575.6204536	2.480773665	0.0611	http://zinc.docking.org/substances/ZINC000238618341/catitems/subsets/for-sale/table.html
26	Nc1cccc(c12)C(=O)c3c(C2=O)cccc3N	C14H10N2O2	238.248	224.9840502	-0.10351	2.024923018	455.5753819	2.099752667	0.0577	http://zinc.docking.org/substances/ZINC000003850742/catitems/subsets/for-sale/table.html
27	c1c(N)c(N)cc(c12)C(=O)c3c(C2=O)cccc3	C14H10N2O2	238.248	224.9840502	-0.10371	2.028754383	456.4373779	2.419123412	0.0949	http://zinc.docking.org/substances/ZINC000004824633/catitems/subsets/for-sale/table.html
28	COc1c(OC)cc(OC)c(c12)C(=O)c3c(C2=O)cccc3	C17H14O5	298.298	179.6927904	-0.10393	2.032968885	365.3098517	2.979009505	0.2248	http://zinc.docking.org/substances/ZINC000005320452/catitems/subsets/for-sale/table.html
29	c1cccc(c2N)c1cc(c23)C(=O)c4c(C3=O)cccc4	C18H11NO2	273.294	196.1331021	-0.10402	2.034692999	399.0706497	2.930005853	0.076	http://zinc.docking.org/substances/ZINC000004253411/catitems/subsets/for-sale/table.html
30	COc1ccc(OC)c(c12)cc3c(c2)C(=O)c4c(C3=O)cccc4	C20H14O4	318.332	168.3839513	-0.10414	2.036991818	342.9967311	2.397171267	0.0966	http://zinc.docking.org/substances/ZINC000005518765/catitems/subsets/for-sale/table.html
31	Cc(c1)c(C)cc(c12)C(=O)c3c(C2=O)cc(C)c(C)c3	C18H16O2	264.327	202.7866998	-0.10415	2.037183386	413.1136958	2.151036416	0.0501	http://zinc.docking.org/substances/ZINC000003844119/catitems/subsets/for-sale/table.html
32	Cc1ccc(C)c(c12)C(=O)c3c(C2=O)c(C)ccc3C	C18H16O2	264.327	202.7866998	-0.10421	2.038332796	413.3467807	2.099358556	0.0891	http://zinc.docking.org/substances/ZINC000005707172/catitems/subsets/for-sale/table.html
33	Nc1cccc(c12)C(=O)c3c(C2=O)c(N)ccc3	C14H10N2O2	238.248	224.9840502	-0.10445	2.042930434	459.6267633	2.102073961	0.0533	http://zinc.docking.org/substances/ZINC000003874034/catitems/subsets/for-sale/table.html
34	Cc(c1)c(C)cc(C2=O)c1C(=O)c(c23)c(C)ccc3C	C18H16O2	264.327	202.7866998	-0.10462	2.046187094	414.939528	2.678313722	0.0944	http://zinc.docking.org/substances/ZINC000005707167/catitems/subsets/for-sale/table.html
35	COc1cc(OC)cc(c12)C(=O)c3c(C2=O)ccc(c3)OC	C17H14O5	298.298	179.6927904	-0.10471	2.047911209	367.9948796	3.132279758	0.0542	http://zinc.docking.org/substances/ZINC000014775121/catitems/subsets/for-sale/table.html
36	Nc1c(N)ccc(c12)C(=O)c3c(C2=O)cccc3	C14H10N2O2	238.248	224.9840502	-0.10521	2.057489621	462.9023483	2.756078625	0.0647	http://zinc.docking.org/substances/ZINC000003881302/catitems/subsets/for-sale/table.html
37	COC(C1=O)=C(OC)C(=O)c(c12)cc(OC)cc2OC	C14H14O6	278.264	192.6300204	-0.1053	2.059213736	396.6663839	2.997375971	0.0691	http://zinc.docking.org/substances/ZINC000014761300/catitems/subsets/for-sale/table.html
38	Cc1cc(C)cc(c12)C(=O)c3c(C2=O)cc(C)cc3C	C18H16O2	264.327	202.7866998	-0.10536	2.060363145	417.8142426	2.605708103	0.0612	http://zinc.docking.org/substances/ZINC000004783245/catitems/subsets/for-sale/table.html
39	COc1cc(OC)cc(c12)C(=O)C=C(C2=O)OC	C13H12O5	248.238	215.9298738	-0.10593	2.071282536	447.2517766	2.742427116	0.0654	http://zinc.docking.org/substances/ZINC000062722947/catitems/subsets/for-sale/table.html
40	c1c(N)ccc(c12)C(=O)c3c(C2=O)cccc3	C14H9NO2	223.233	240.1168286	-0.10643	2.080860949	499.6497317	2.030299703	0.0533	http://zinc.docking.org/substances/ZINC000003874029/catitems/subsets/for-sale/table.html
41	O=C1C(=O)C=C(N)c(c12)cccc2N	C10H8N2O2	188.187	284.8337026	-0.10651	2.082393495	593.1358494	2.796177633	0.0695	http://zinc.docking.org/substances/ZINC000238633969/catitems/subsets/for-sale/table.html
42	COc1c(OC)c(OC)cc(c12)C(=O)c3c(C2=O)ccc(c3)OC	C18H16O6	328.325	163.258966	-0.10683	2.088523679	340.9702163	3.615764089	0.1059	http://zinc.docking.org/substances/ZINC000105942294/catitems/subsets/for-sale/table.html
43	Nc1cccc(c12)c3c(C(=O)C2=O)c(N)ccc3	C14H10N2O2	238.248	224.9840502	-0.10719	2.095420136	471.4361091	1.932896977	0.0864
44	Cc1c(C)ccc2C(=O)C(=O)c(c3c12)ccc(C)c3C	C18H16O2	264.327	202.7866998	-0.10726	2.096761114	425.1952665	3.16739327	0.6501	http://zinc.docking.org/substances/ZINC000001722241/catitems/subsets/for-sale/table.html
45	NC1=CC(=O)C(N)=CC1=O	C6H6N2O2	138.127	388.0631593	-0.10743	2.100017774	814.939532	2.269504277	0.0768	http://zinc.docking.org/substances/ZINC000100452001/catitems/subsets/for-sale/table.html
46	O=C1C=CC(=O)c(c12)c(N)c(N)c(N)c2N	C10H10N4O2	218.217	245.6362245	-0.10771	2.105381685	517.1580083	2.081673756	0.0681
47	c1c(N)ccc(c12)C(=O)C=C(C2=O)N	C10H8N2O2	188.187	284.8337026	-0.10867	2.123772238	604.92191	2.573928623	0.0816	http://zinc.docking.org/substances/ZINC000238616741/catitems/subsets/for-sale/table.html
48	COc(c1)c(OC)cc(c12)C(=O)c3c(C2=O)cccc3	C16H12O4	268.272	199.8046759	-0.10875	2.125304784	424.6458336	2.522005891	0.1048	http://zinc.docking.org/substances/ZINC000005081630/catitems/subsets/for-sale/table.html
49	O=C1C(N)=CC(=O)c(c12)cccc2N	C10H8N2O2	188.187	284.8337026	-0.10886	2.127412035	605.9586468	2.600790929	0.0653	http://zinc.docking.org/substances/ZINC000238585636/catitems/subsets/for-sale/table.html
50	COC(C1=O)=C(OC)C(=O)c(c12)cccc2OC	C13H12O5	248.238	215.9298738	-0.1089	2.128178308	459.5372734	2.789128208	0.0693	http://zinc.docking.org/substances/ZINC000014815395/catitems/subsets/for-sale/table.html
51	COc(c1)ccc(c12)C(=O)c3c(C2=O)ccc(c3)OC	C16H12O4	268.272	199.8046759	-0.10894	2.128944581	425.373082	2.2598396	0.0498	http://zinc.docking.org/substances/ZINC000005257366/catitems/subsets/for-sale/table.html
52	Cc1cc(C)cc2C(=O)C(=O)c(c3c12)cc(C)cc3C	C18H16O2	264.327	202.7866998	-0.10911	2.132201241	432.382053	2.765083376	0.1122	http://zinc.docking.org/substances/ZINC000001722240/catitems/subsets/for-sale/table.html
53	Cc(c1)ccc(c12)C(=O)c3c(C2=O)ccc(C)c3	C16H12O2	236.273	226.8646862	-0.10949	2.139480835	485.3726483	2.270784827	0.0524	http://zinc.docking.org/substances/ZINC000003844116/catitems/subsets/for-sale/table.html
54	COc1cccc(c12)C(=O)c3c(C2=O)cccc3	C15H10O3	238.245	224.9868833	-0.10971	2.143695337	482.3033325	2.364002705	0.0877	http://zinc.docking.org/substances/ZINC000003875551/catitems/subsets/for-sale/table.html
55	c1cccc(c12)C(=O)C(N)=C(C2=O)N	C10H8N2O2	188.187	284.8337026	-0.11001	2.149442384	612.2336328	2.069421544	0.0591	http://zinc.docking.org/substances/ZINC000035183022/catitems/subsets/for-sale/table.html
56	COc1cccc(c12)C(=O)C=C(C2=O)OC	C12H10O4	218.211	245.6429786	-0.11023	2.153656886	529.0306923	2.742837147	0.0671	http://zinc.docking.org/substances/ZINC000013335511/catitems/subsets/for-sale/table.html
57	c1cc(N)cc(c1c23)C(=O)C(=O)c2cc(N)cc3	C14H10N2O2	238.248	224.9840502	-0.11023	2.153656886	484.5384489	2.210670351	0.5503	http://zinc.docking.org/substances/ZINC000002369677/catitems/subsets/for-sale/table.html
58	Nc1cccc(c12)C(=O)c3c(C2=O)cccc3	C14H9NO2	223.233	240.1168286	-0.11032	2.155381	517.5432502	2.235460218	0.0716	http://zinc.docking.org/substances/ZINC000003850741/catitems/subsets/for-sale/table.html
59	Cc1c(C)ccc(c12)C(=O)c3c(C2=O)cccc3	C16H12O2	236.273	226.8646862	-0.11043	2.157488251	489.457895	2.867457976	0.0967	http://zinc.docking.org/substances/ZINC000005343162/catitems/subsets/for-sale/table.html
60	COc1cc(OC)cc(c12)C(=O)C(=CC2=O)OC	C13H12O5	248.238	215.9298738	-0.11044	2.157679819	465.9075311	2.811654331	0.0913	http://zinc.docking.org/substances/ZINC000014815397/catitems/subsets/for-sale/table.html
61	c1cccc(c2)c1cc(c23)C(=O)c4c(C3=O)cccc4	C18H10O2	258.279	207.5352623	-0.11047	2.158254524	447.9139188	2.213276123	0.101	http://zinc.docking.org/substances/ZINC000003848023/catitems/subsets/for-sale/table.html
62	Cc1ccc(C)c(c12)C(=O)c3c(C2=O)cccc3	C16H12O2	236.273	226.8646862	-0.11055	2.15978707	489.9794159	2.244102305	0.0998	http://zinc.docking.org/substances/ZINC000004284416/catitems/subsets/for-sale/table.html
63	Cc(c1)ccc(c12)C(=O)c3c(C2=O)cc(C)cc3	C16H12O2	236.273	226.8646862	-0.11062	2.161128048	490.2836364	2.270784827	0.0546	http://zinc.docking.org/substances/ZINC000003844118/catitems/subsets/for-sale/table.html
64	Cc(c1)c(C)cc(c12)C(=O)c3c(C2=O)cccc3	C16H12O2	236.273	226.8646862	-0.11066	2.161894321	490.4574767	2.380787158	0.0539	http://zinc.docking.org/substances/ZINC000004538454/catitems/subsets/for-sale/table.html
65	COc(c1)ccc(c12)C(=O)c3c(C2=O)cc(cc3)OC	C16H12O4	268.272	199.8046759	-0.11067	2.162085889	431.9948703	2.2598396	0.0589	http://zinc.docking.org/substances/ZINC000039001427/catitems/subsets/for-sale/table.html
66	c12c3c4c(=O)c(=O)c1ccc(N)c2ccc3ccc4	C16H9NO2	247.256	216.7874592	-0.11101	2.16859921	470.1251127	2.751715559	0.0401	http://zinc.docking.org/substances/ZINC000100456357/catitems/subsets/for-sale/table.html
67	Cc1cc(C)cc(c12)C(=O)c3c(C2=O)cccc3	C16H12O2	236.273	226.8646862	-0.11115	2.171281165	492.5870202	2.794940024	0.0702	http://zinc.docking.org/substances/ZINC000005212246/catitems/subsets/for-sale/table.html
68	c1cccc(c1c23)C(=O)C(=O)c2ccc(c3)N	C14H9NO2	223.233	240.1168286	-0.11133	2.174729394	522.1891252	2.567503412	0.8383	http://zinc.docking.org/substances/ZINC000013862817/catitems/subsets/for-sale/table.html
69	O=C1C=CC(=O)c(c12)c(N)ccc2N	C10H8N2O2	188.187	284.8337026	-0.11137	2.175495667	619.6544858	1.827052303	0.1016
70	O=C1C=C(N)C(=O)c(c12)cccc2N	C10H8N2O2	188.187	284.8337026	-0.11143	2.176645077	619.9818764	2.725487221	0.0982	http://zinc.docking.org/substances/ZINC000100860155/catitems/subsets/for-sale/table.html
71	COc1ccc(OC)c2c(C(=O)C=CC3=O)c3c(c4c12)c(OC)ccc4OC	C22H18O6	378.385	141.6599495	-0.11148	2.177602918	308.4791194	1.962189023	0.4958
72	COc1c(OC)ccc(c12)C(=O)c3c(C2=O)cccc3	C16H12O4	268.272	199.8046759	-0.11181	2.18392467	436.3583609	2.884325447	0.0929	http://zinc.docking.org/substances/ZINC000004127831/catitems/subsets/for-sale/table.html
73	NC1=C(N)C(=O)C(=O)C(N)=C1N	C6H8N4O2	168.156	318.7635291	-0.11237	2.194652493	699.5751737	1.82429528	0.0699
74	COc1cccc(c12)C(=O)C(=CC2=O)OC	C12H10O4	218.211	245.6429786	-0.11264	2.199824836	540.371525	2.608284668	0.1018	http://zinc.docking.org/substances/ZINC000039251536/catitems/subsets/for-sale/table.html
75	c1cccc(c2Cl)c1cc(c23)C(=O)c4c(C3=O)cccc4	C18H9ClO2	292.724	183.1144696	-0.11276	2.202123655	403.240705	2.852147036	0.1246	http://zinc.docking.org/substances/ZINC000004258046/catitems/subsets/for-sale/table.html
76	O=C1C=CC(=O)c(c12)cc3c(c2)cc(N)c(c3)N	C14H10N2O2	238.248	224.9840502	-0.11281	2.203081496	495.6581979	2.16986446	0.0388
77	COc1ccc(OC)c(c12)C(=O)c3c(C2=O)cccc3	C16H12O4	268.272	199.8046759	-0.11294	2.205571883	440.6835753	2.261196346	0.0718	http://zinc.docking.org/substances/ZINC000004016162/catitems/subsets/for-sale/table.html
78	O=C1C(N)=CC(N)=CC1=O	C6H6N2O2	138.127	388.0631593	-0.11296	2.20595502	856.0498742	2.221256378	0.0669	http://zinc.docking.org/substances/ZINC000104561595/catitems/subsets/for-sale/table.html
79	COc1ccc(OC)c(c12)C(=O)C=CC2=O	C12H10O4	218.211	245.6429786	-0.11301	2.206912861	542.1126487	1.913429393	0.1086	http://zinc.docking.org/substances/ZINC000001578407/catitems/subsets/for-sale/table.html
80	c1cccc(c12)C(N)=C(N)C(=O)C2=O	C10H8N2O2	188.187	284.8337026	-0.11321	2.210744226	629.6944634	2.050134088	0.0563
81	COc1cccc(C2=O)c1C(=O)c3ccc(c4c23)cccc4	C19H12O3	288.306	185.920515	-0.11328	2.212085204	411.2720203	2.993442675	0.9882	http://zinc.docking.org/substances/ZINC000004146891/catitems/subsets/for-sale/table.html
82	Cc(c1)ccc(c12)C(=O)c3c(C2=O)cccc3	C15H10O2	222.246	241.1831934	-0.1133	2.21246834	533.6101797	2.258623578	0.0568	http://zinc.docking.org/substances/ZINC000003845299/catitems/subsets/for-sale/table.html
83	NC1=C(N)C(=O)C(N)=C(C1=O)N	C6H8N4O2	168.156	318.7635291	-0.11336	2.21361775	705.6206061	1.783206906	0.0675	http://zinc.docking.org/substances/ZINC000115673885/catitems/subsets/for-sale/table.html
84	COc(c1)ccc(c12)C(=O)c3c(C2=O)cccc3	C15H10O3	238.245	224.9868833	-0.11343	2.214958728	498.3366608	2.443303034	0.0653	http://zinc.docking.org/substances/ZINC000014442973/catitems/subsets/for-sale/table.html
85	c12c3c4c(=O)c(=O)c1c(OC)ccc2ccc3ccc4OC	C18H12O4	292.294	183.3838532	-0.11366	2.219364798	406.9956683	2.198915498	0.107
86	Cc1cccc(c12)C(=O)c3c(C2=O)cccc3	C15H10O2	222.246	241.1831934	-0.11375	2.221088912	535.6893166	2.393591713	0.07	http://zinc.docking.org/substances/ZINC000005699366/catitems/subsets/for-sale/table.html
87	COC(C1=O)=C(OC)C(=O)c(c12)ccc(c2)OC	C13H12O5	248.238	215.9298738	-0.11401	2.226069687	480.6749465	2.585460238	0.0698	http://zinc.docking.org/substances/ZINC000034119947/catitems/subsets/for-sale/table.html
88	c1cccc(c12)C(N)=CC(=O)C2=O	C10H7NO2	173.173	309.5286217	-0.11447	2.234881826	691.7598914	2.192951627	0.0498	http://zinc.docking.org/substances/ZINC000100314659/catitems/subsets/for-sale/table.html
89	Nc1cccc(c12)c3c(C(=O)C2=O)cccc3	C14H9NO2	223.233	240.1168286	-0.11517	2.248291604	539.8526498	2.567546842	0.0626	http://zinc.docking.org/substances/ZINC000013862816/catitems/subsets/for-sale/table.html
90	NC1=CC(=O)C(=O)C=C1N	C6H6N2O2	138.127	388.0631593	-0.11541	2.252889242	874.263317	2.192831237	0.0661	http://zinc.docking.org/substances/ZINC000100452004/catitems/subsets/for-sale/table.html
91	Cc1cccc2ccc(c3c12)C(=O)c4c(C3=O)cccc4	C19H12O2	272.306	196.8447262	-0.11591	2.262467655	445.3548261	3.120464652	0.1963	http://zinc.docking.org/substances/ZINC000196073466/catitems/subsets/for-sale/table.html
92	Cc1c(C)c(C)c(C)c(c12)C(=O)C=CC2=O	C14H14O2	214.266	250.1656819	-0.11594	2.26304236	566.1355352	2.015576776	0.1796
93	COc1cccc(c12)C=C(C(=O)C2=O)OC	C12H10O4	218.211	245.6429786	-0.11625	2.268980976	557.3592453	2.520859731	0.1093	http://zinc.docking.org/substances/ZINC000032142265/catitems/subsets/for-sale/table.html
94	COC(C1=O)=C(OC)C(=O)c(c12)c(OC)ccc2OC	C14H14O6	278.264	192.6300204	-0.11627	2.269364113	437.1476553	1.944706065	0.1205
95	c1ccc(OC)c(c1c23)ccc2C(=O)c4c(C3=O)cccc4	C19H12O3	288.306	185.920515	-0.11653	2.274344887	422.8473727	3.142642176	0.7146	http://zinc.docking.org/substances/ZINC000006019209/catitems/subsets/for-sale/table.html
96	COC(C1=O)=C(OC)C(=O)C(OC)=C1OC	C10H12O6	228.204	234.8863298	-0.11653	2.274344887	534.2125232	1.756775142	0.0947	http://zinc.docking.org/substances/ZINC000001598428/catitems/subsets/for-sale/table.html
97	c1cccc(c2)c1cc(c23)C(=O)c4c(C3=O)cc(Cl)cc4	C18H9ClO2	292.724	183.1144696	-0.11667	2.277026843	416.9565626	2.567107867	0.0336	http://zinc.docking.org/substances/ZINC000147455069/catitems/subsets/for-sale/table.html
98	c1cccc(c1c23)C(=O)C(=O)c2cc(N)cc3	C14H9NO2	223.233	240.1168286	-0.11679	2.279325662	547.3044493	2.406754372	0.0465	http://zinc.docking.org/substances/ZINC000001713558/catitems/subsets/for-sale/table.html
99	c1cccc(c12)C(=O)c3c(C2=O)cccc3	C14H8O2	208.219	257.4308781	-0.11689	2.281241344	587.2619624	2.014585246	0.0417	http://zinc.docking.org/substances/ZINC000003847491/catitems/subsets/for-sale/table.html
100	COC(C1=O)=C(OC)C(=O)c(c12)cccc2	C12H10O4	218.211	245.6429786	-0.11724	2.287946233	562.0179276	2.14593886	0.071	http://zinc.docking.org/substances/ZINC000000518909/catitems/subsets/for-sale/table.html
101	O=C1C(C)=C(C)C(=O)c(c12)ccc(C)c2	C13H12O2	200.239	267.6901103	-0.11748	2.292543871	613.6913218	2.540559834	0.107	http://zinc.docking.org/substances/ZINC000005781983/catitems/subsets/for-sale/table.html
102	COc1cc(OC)cc2C(=O)C(=O)c(c3c12)cc(cc3)OC	C17H14O5	298.298	179.6927904	-0.1175	2.292927008	412.0224523	2.836969436	0.104	http://zinc.docking.org/substances/ZINC000014817681/catitems/subsets/for-sale/table.html
103	c1cccc(c12)C(=O)C=C(C2=O)N	C10H7NO2	173.173	309.5286217	-0.11755	2.293884849	710.0230157	2.002006059	0.0849	http://zinc.docking.org/substances/ZINC000011525762/catitems/subsets/for-sale/table.html
104	c1cc(C)cc(C2=O)c1C(=O)c3ccc(c4c23)cccc4	C19H12O2	272.306	196.8447262	-0.11768	2.296375237	452.0293547	3.36833492	0.6864	http://zinc.docking.org/substances/ZINC000004769016/catitems/subsets/for-sale/table.html
105	Cc(c1)ccc2C(=O)C(=O)c(c3c12)ccc(C)c3	C16H12O2	236.273	226.8646862	-0.1178	2.298674056	521.4879683	2.673479804	0.0434	http://zinc.docking.org/substances/ZINC000039598846/catitems/subsets/for-sale/table.html
106	c1cccc(c1c23)C(=O)C(=O)c2cccc3N	C14H9NO2	223.233	240.1168286	-0.11792	2.300972875	552.5023094	2.391707208	0.1128	http://zinc.docking.org/substances/ZINC000001606489/catitems/subsets/for-sale/table.html
107	COc1ccc(OC)c2ccc(c3c12)C(=O)C=CC3=O	C16H12O4	268.272	199.8046759	-0.11815	2.305378945	460.6254929	2.927989131	0.1128	http://zinc.docking.org/substances/ZINC000006018114/catitems/subsets/for-sale/table.html
108	Cc(c1)c(C)cc2C(=O)C(=O)c(c3c12)cccc3	C16H12O2	236.273	226.8646862	-0.11841	2.310359719	524.1390327	2.817819179	0.0441	http://zinc.docking.org/substances/ZINC000037633860/catitems/subsets/for-sale/table.html
109	COc1cc(OC)cc(c12)C(=O)C=CC2=O	C12H10O4	218.211	245.6429786	-0.11853	2.312658538	568.0883318	2.15995288	0.1029
110	COC1=C(OC)C(OC)=C(C(=O)C1=O)OC	C10H12O6	228.204	234.8863298	-0.11856	2.313233243	543.3468665	2.004409503	0.0686
111	COc(c1)ccc2C(=O)C(=O)c(c3c12)cccc3	C15H10O3	238.245	224.9868833	-0.11888	2.319363427	521.8263488	2.673498392	0.0437	http://zinc.docking.org/substances/ZINC000062722547/catitems/subsets/for-sale/table.html
112	COc1ccc(OC)c2c(=CC(=O)C(=O)C3)c=3c(c4c12)c(OC)ccc4OC	C22H18O6	378.385	141.6599495	-0.11919	2.325302043	329.40217	2.170991633	0.3301
113	NC1C(=O)C(=O)C(N)=c(c=12)c(N)c3c(c2N)cccc3	C14H12N4O2	268.277	199.800952	-0.11924	2.326259885	464.7889395	2.151356444	0.2342
114	c1c(N)ccc(c12)C(=O)C=CC2=O	C10H7NO2	173.173	309.5286217	-0.11937	2.328750272	720.8148619	2.058685418	0.0608	http://zinc.docking.org/substances/ZINC000075563277/catitems/subsets/for-sale/table.html
115	Cc1cccc(c12)c3c(C(=O)C2=O)cccc3	C15H10O2	222.246	241.1831934	-0.11956	2.332390069	562.533285	2.894635926	0.0424	http://zinc.docking.org/substances/ZINC000060232540/catitems/subsets/for-sale/table.html
116	COC(C1=O)=CC(=O)c(c12)cccc2	C11H8O3	188.185	284.8367298	-0.11968	2.334688888	665.0051479	2.131967302	0.0852	http://zinc.docking.org/substances/ZINC000002566243/catitems/subsets/for-sale/table.html
117	O=C1C(=O)C=C(OC)c(c12)cccc2	C11H8O3	188.185	284.8367298	-0.11982	2.337370843	665.7690674	2.171552899	0.0586	http://zinc.docking.org/substances/ZINC000013443862/catitems/subsets/for-sale/table.html
118	COC(C1=O)=CC(=O)C(=C1)OC	C8H8O4	168.151	318.7730076	-0.11984	2.33775398	745.2128672	1.821564458	0.0756	http://zinc.docking.org/substances/ZINC000001603364/catitems/subsets/for-sale/table.html
119	c12c3c4c(N)c(N)c1cccc2c(=O)c(=O)c3ccc4	C16H10N2O2	262.27	204.3771686	-0.11988	2.338520253	477.940148	2.076132119	0.041
120	O=C1C(N)=CC(=O)C=C1N	C6H6N2O2	138.127	388.0631593	-0.12	2.340819072	908.3856444	1.93813909	0.0739	http://zinc.docking.org/substances/ZINC000104644151/catitems/subsets/for-sale/table.html
121	O=C1C(=O)C(C)=C(C)c(c12)cccc2C	C13H12O2	200.239	267.6901103	-0.12011	2.342926323	627.1782058	2.973835357	0.0485	http://zinc.docking.org/substances/ZINC000039096145/catitems/subsets/for-sale/table.html
122	COC(C1=O)=C(OC)C(=O)C=C1OC	C9H10O5	198.177	270.4753831	-0.12018	2.344267301	634.0665962	2.360723041	0.0836	http://zinc.docking.org/substances/ZINC000001676043/catitems/subsets/for-sale/table.html
123	O=C1C(=O)C(OC)=C(OC)c(c12)cccc2	C12H10O4	218.211	245.6429786	-0.12024	2.34541671	576.1351467	2.153211132	0.0751
124	O=C1C=CC(=O)c(c12)cc3c(c2)cc4c(c3)cccc4	C18H10O2	258.279	207.5352623	-0.12031	2.346757688	487.0349723	2.551687618	0.0423	http://zinc.docking.org/substances/ZINC000034256119/catitems/subsets/for-sale/table.html
125	Clc1cccc(c12)C(=O)c3c(C2=O)cccc3	C14H7ClO2	242.664	220.88979	-0.12036	2.347715529	518.5863902	2.03868177	0.0871	http://zinc.docking.org/substances/ZINC000003860257/catitems/subsets/for-sale/table.html
126	COc(cc1)cc(c2)c1cc(c23)C(=O)C=CC3=O	C15H10O3	238.245	224.9868833	-0.12045	2.349439644	528.5931029	2.098913587	0.0445
127	COc1cccc(c12)cc3c(c2)C(=O)C(=O)C=C3	C15H10O3	238.245	224.9868833	-0.12048	2.350014348	528.7224039	2.752625355	0.0663	http://zinc.docking.org/substances/ZINC000584614314/catitems/subsets/for-sale/table.html
128	c1cccc(c2OC)c1cc(c23)C(=O)C=CC3=O	C15H10O3	238.245	224.9868833	-0.12068	2.353845713	529.5844108	2.735431773	0.0988	http://zinc.docking.org/substances/ZINC000003051841/catitems/subsets/for-sale/table.html
129	c1cccc(c1c23)ccc2C(=O)c4c(C3=O)cccc4	C18H10O2	258.279	207.5352623	-0.12076	2.355378259	488.8240449	2.744968475	0.1406	http://zinc.docking.org/substances/ZINC000003861589/catitems/subsets/for-sale/table.html
130	Cc(c1)c(C)cc(c12)C(=O)C(=O)C=C2C	C13H12O2	200.239	267.6901103	-0.12083	2.356719237	630.8704326	2.600683617	0.0537	http://zinc.docking.org/substances/ZINC000039096184/catitems/subsets/for-sale/table.html
131	Cc(c1)ccc2C(=O)C(=O)c(c3c12)cccc3	C15H10O2	222.246	241.1831934	-0.12092	2.358443352	568.816899	2.881297916	0.0436	http://zinc.docking.org/substances/ZINC000037629062/catitems/subsets/for-sale/table.html
132	O=C1C(C)=C(C)C(=O)c(c12)cccc2	C12H10O2	186.212	287.8547032	-0.12095	2.359018056	679.0544424	2.378409455	0.1079	http://zinc.docking.org/substances/ZINC000003063275/catitems/subsets/for-sale/table.html
133	c1c(N)ccc(c12)C=CC(=O)C2=O	C10H7NO2	173.173	309.5286217	-0.12095	2.359018056	730.1836075	2.340988702	0.0616	http://zinc.docking.org/substances/ZINC000136949178/catitems/subsets/for-sale/table.html
134	COc1cccc2ccc(c3c12)C(=O)C=CC3=O	C15H10O3	238.245	224.9868833	-0.12109	2.361700012	531.351525	2.535401859	0.385	http://zinc.docking.org/substances/ZINC000006019201/catitems/subsets/for-sale/table.html
135	O=C1C(N)=C(N)C=CC1=O	C6H6N2O2	138.127	388.0631593	-0.12117	2.363232558	917.0834926	1.874741211	0.0641
136	Nc1ccc(N)c(c2=O)c1c(=O)c(c23)c(=O)c4c(c3=O)c(N)ccc4N	C18H12N4O4	348.321	307.7735767	-0.12151	2.369745879	729.3451649	1.893808419	0.3094
137	COc1cccc(c12)C=CC(=O)C2=O	C11H8O3	188.185	284.8367298	-0.12173	2.37396038	676.1911114	2.505860495	0.1114	http://zinc.docking.org/substances/ZINC000034203392/catitems/subsets/for-sale/table.html
138	Cc1cccc(c12)C(=O)C=C(C)C2=O	C12H10O2	186.212	287.8547032	-0.1218	2.375301358	683.7416674	3.018680005	0.0598	http://zinc.docking.org/substances/ZINC000038338768/catitems/subsets/for-sale/table.html
139	O=C1C(C)=CC(=O)c(c12)ccc(C)c2	C12H10O2	186.212	287.8547032	-0.1219	2.377217041	684.2931057	2.644379645	0.0701	http://zinc.docking.org/substances/ZINC000000899240/catitems/subsets/for-sale/table.html
140	COc1cccc(c12)C(=O)C=CC2=O	C11H8O3	188.185	284.8367298	-0.12198	2.378749587	677.5552533	1.781085346	0.0942	http://zinc.docking.org/substances/ZINC000000261797/catitems/subsets/for-sale/table.html
141	Cc1cccc(c12)C(=O)C(C)=CC2=O	C12H10O2	186.212	287.8547032	-0.12238	2.386412317	686.9400092	2.969813192	0.1154	http://zinc.docking.org/substances/ZINC000030836200/catitems/subsets/for-sale/table.html
142	COC(=C1)C(OC)=CC(=O)C1=O	C8H8O4	168.151	318.7730076	-0.1224	2.386795453	760.8459652	1.83407662	0.0621	http://zinc.docking.org/substances/ZINC000001710884/catitems/subsets/for-sale/table.html
143	COc(c1)c(OC)cc(c12)C(=O)C=CC2=O	C12H10O4	218.211	245.6429786	-0.12243	2.387370158	586.4407167	2.113658487	0.0624	http://zinc.docking.org/substances/ZINC000038293555/catitems/subsets/for-sale/table.html
144	Cc(c1)c(C)cc(c12)C=C(C)C(=O)C2=O	C13H12O2	200.239	267.6901103	-0.12251	2.388902704	639.4856284	2.737409506	0.0686	http://zinc.docking.org/substances/ZINC000039096186/catitems/subsets/for-sale/table.html
145	O=C1C=C(C)C(=O)c(c12)ccc(C)c2	C12H10O2	186.212	287.8547032	-0.12258	2.390243682	688.0428857	2.622648456	0.0819	http://zinc.docking.org/substances/ZINC000001673098/catitems/subsets/for-sale/table.html
146	Cc1ccc(C)c(c12)C(=O)C=CC2=O	C12H10O2	186.212	287.8547032	-0.12258	2.390243682	688.0428857	1.725831613	0.0533	http://zinc.docking.org/substances/ZINC000104500197/catitems/subsets/for-sale/table.html
147	c1cccc(C(=O)C2=O)c1c(c23)ccc4c3cccc4	C18H10O2	258.279	207.5352623	-0.12263	2.391201523	496.2586354	2.856781629	0.2585	http://zinc.docking.org/substances/ZINC000001680760/catitems/subsets/for-sale/table.html
148	O=C1C=CC(=O)c(c12)cccc2N	C10H7NO2	173.173	309.5286217	-0.12263	2.391201523	740.1453117	2.040473234	0.0841	http://zinc.docking.org/substances/ZINC000001754489/catitems/subsets/for-sale/table.html
149	CC1=C(C)C(=O)C(C)=C(C)C1=O	C10H12O2	164.206	326.4314337	-0.12315	2.401163073	783.8151043	1.747944141	0.0781	http://zinc.docking.org/substances/ZINC000000087597/catitems/subsets/for-sale/table.html
150	COC(C1=O)=CC(=O)C=C1OC	C8H8O4	168.151	318.7730076	-0.12317	2.401546209	765.548108	2.081811681	0.0732	http://zinc.docking.org/substances/ZINC000000137119/catitems/subsets/for-sale/table.html
151	NC1=C(N)C(=O)C=CC1=O	C6H6N2O2	138.127	388.0631593	-0.12327	2.403461892	932.695015	1.716767698	0.0771	http://zinc.docking.org/substances/ZINC000104590835/catitems/subsets/for-sale/table.html
152	c1c(Cl)ccc(c12)C(=O)c3c(C2=O)cccc3	C14H7ClO2	242.664	220.88979	-0.12337	2.405377574	531.3233473	2.154437316	0.0706	http://zinc.docking.org/substances/ZINC000003861197/catitems/subsets/for-sale/table.html
153	c1cccc(c1c23)C(=O)C(=O)c3ccc4c2cccc4	C18H10O2	258.279	207.5352623	-0.12339	2.405760711	499.2801801	3.02513187	0.7183	http://zinc.docking.org/substances/ZINC000002558835/catitems/subsets/for-sale/table.html
154	COC1=CC(OC)=CC(=O)C1=O	C8H8O4	168.151	318.7730076	-0.12339	2.405760711	766.8915773	2.269526338	0.0727	http://zinc.docking.org/substances/ZINC000196521061/catitems/subsets/for-sale/table.html
155	Clc1cccc(c12)C(=O)c3c(C2=O)cccc3Cl	C14H6Cl2O2	277.109	193.4329091	-0.12339	2.405760711	465.3532929	1.948679714	0.041	http://zinc.docking.org/substances/ZINC000003860347/catitems/subsets/for-sale/table.html
156	Clc1ccc(Cl)c(c12)C(=O)c3c(C2=O)cccc3	C14H6Cl2O2	277.109	193.4329091	-0.1234	2.405952279	465.3903485	2.12477333	0.1183	http://zinc.docking.org/substances/ZINC000004975455/catitems/subsets/for-sale/table.html
157	c12c3c4c(=O)c(=O)c1cccc2ccc3ccc4	C16H8O2	232.241	230.8033465	-0.12346	2.407101689	555.5671251	1.969119613	0.0389	http://zinc.docking.org/substances/ZINC000002172036/catitems/subsets/for-sale/table.html
158	Nc1ccc(N)c(c1c23)c=4c(=CC(=O)C(=O)C4)c2c(N)ccc3N	C18H14N4O2	318.338	168.3807777	-0.12357	2.409208939	405.6644749	2.170216108	0.5323
159	Clc1cccc(c12)C(=O)c3c(C2=O)c(Cl)ccc3	C14H6Cl2O2	277.109	193.4329091	-0.12358	2.409400508	466.0573494	1.78535599	0.2009	http://zinc.docking.org/substances/ZINC000003875552/catitems/subsets/for-sale/table.html
160	COC1=C(OC)C=C(C(=O)C1=O)OC	C9H10O5	198.177	270.4753831	-0.1238	2.413615009	652.8234443	2.159771635	0.0722
161	O=C1C=CC(=O)c(c12)cc3c(c2)cccc3	C14H8O2	208.219	257.4308781	-0.12381	2.413806578	621.3883468	1.998776026	0.0396	http://zinc.docking.org/substances/ZINC000001686135/catitems/subsets/for-sale/table.html
162	c12c3c4c(=O)c(=O)c1c(Cl)ccc2ccc3ccc4Cl	C16H6Cl2O2	301.131	178.0022648	-0.12401	2.417637943	430.3450293	1.986730142	0.0918
163	Cc1cccc(c12)C=C(C)C(=O)C2=O	C12H10O2	186.212	287.8547032	-0.12403	2.418021079	696.0387401	2.696347924	0.0531	http://zinc.docking.org/substances/ZINC000001632369/catitems/subsets/for-sale/table.html
164	Cc1cc(C)cc(c12)C(=O)C(=O)C(C)=C2	C13H12O2	200.239	267.6901103	-0.12416	2.420511466	647.9469814	2.834087932	0.0632	http://zinc.docking.org/substances/ZINC000205062472/catitems/subsets/for-sale/table.html
165	c1cccc(c1c23)C(=O)C(=O)c2cccc3	C14H8O2	208.219	257.4308781	-0.12424	2.422044013	623.5089169	1.734935391	0.0438	http://zinc.docking.org/substances/ZINC000001529614/catitems/subsets/for-sale/table.html
166	Cc(c1)c(C)cc(c12)C(=O)C=CC2=O	C12H10O2	186.212	287.8547032	-0.12425	2.422235581	697.2519042	1.859984073	0.0647	http://zinc.docking.org/substances/ZINC000001689559/catitems/subsets/for-sale/table.html
167	CC1=C(C)C(=O)C(=O)c(c12)cccc2	C12H10O2	186.212	287.8547032	-0.12447	2.426450082	698.4650683	2.487789321	0.0571	http://zinc.docking.org/substances/ZINC000104500189/catitems/subsets/for-sale/table.html
168	c1cccc(c2Cl)c1cc(c23)cc4c(c3)C=CC(=O)C4=O	C18H9ClO2	292.724	183.1144696	-0.12452	2.427407924	444.4935145	2.66992841	0.0394	http://zinc.docking.org/substances/ZINC000514278459/catitems/subsets/for-sale/table.html
169	O=C1C(=O)C=Cc(c12)cc3c(c2)cccc3	C14H8O2	208.219	257.4308781	-0.12466	2.430089879	625.5801715	2.331643355	0.0445	http://zinc.docking.org/substances/ZINC000001593860/catitems/subsets/for-sale/table.html
170	Cc(c1)c(C)cc(c12)C=CC(=O)C2=O	C12H10O2	186.212	287.8547032	-0.12511	2.438710451	701.994273	2.285082392	0.0629	http://zinc.docking.org/substances/ZINC000101224595/catitems/subsets/for-sale/table.html
171	Clc1c(Cl)ccc(c12)C(=O)c3c(C2=O)cccc3	C14H6Cl2O2	277.109	193.4329091	-0.12525	2.441392406	472.2456354	2.563402202	0.1406	http://zinc.docking.org/substances/ZINC000039427243/catitems/subsets/for-sale/table.html
172	O=C1C(=O)C(C)=Cc(c12)ccc(C)c2	C12H10O2	186.212	287.8547032	-0.12546	2.44541534	703.9243068	2.462979876	0.069	http://zinc.docking.org/substances/ZINC000001593856/catitems/subsets/for-sale/table.html
173	O=C1C(C)=CC(=O)c(c12)cccc2	C11H8O2	172.185	311.3047013	-0.12552	2.446564749	761.6271085	2.032758639	0.0765	http://zinc.docking.org/substances/ZINC000000001677/catitems/subsets/for-sale/table.html
174	c1c(N)ccc(c1=2)=C(N)C(=O)C(=O)C2N	C10H9N3O2	203.202	263.7867738	-0.12594	2.454610616	647.4938153	2.055807419	0.0588
175	O=C1C(=O)C=CC(=C1)N	C6H5NO2	123.112	435.3921632	-0.12597	2.455185321	1068.968448	2.177617053	0.0602
176	COc1ccc(OC)c2c1c(=O)c(=O)c(c23)c4c(c(=O)c3=O)c(OC)ccc4OC	C22H16O8	408.368	262.5181209	-0.12608	2.457292572	645.0838284	2.082511492	0.5669
177	c1c(Cl)ccc(c1c23)ccc2C(=O)c4c(C3=O)cccc4	C18H9ClO2	292.724	183.1144696	-0.12626	2.4607408	450.5972465	2.997544808	0.1728	http://zinc.docking.org/substances/ZINC000019899127/catitems/subsets/for-sale/table.html
178	Clc1ccc(Cl)c(c12)C(=O)c3c(C2=O)c(Cl)ccc3	C14H5Cl3O2	311.554	172.0472213	-0.12633	2.462081778	423.5943285	2.463508966	0.0863	http://zinc.docking.org/substances/ZINC000005234081/catitems/subsets/for-sale/table.html
179	Clc1cc(Cl)cc(c12)C(=O)c3c(C2=O)cccc3	C14H6Cl2O2	277.109	193.4329091	-0.12634	2.462273346	476.2846964	2.600933037	0.0832	http://zinc.docking.org/substances/ZINC000005543085/catitems/subsets/for-sale/table.html
180	Clc1cccc(c12)C(=O)c3c(C2=O)cc(Cl)cc3	C14H6Cl2O2	277.109	193.4329091	-0.12659	2.467062553	477.2110865	2.696370049	0.0587	http://zinc.docking.org/substances/ZINC000034273489/catitems/subsets/for-sale/table.html
181	COc(cc1)cc(c12)C=CC(=O)C2=O	C11H8O3	188.185	284.8367298	-0.1266	2.467254121	702.7645954	2.140345205	0.0607	http://zinc.docking.org/substances/ZINC000034153403/catitems/subsets/for-sale/table.html
182	Clc1cccc(c12)C(=O)c3c(C2=O)ccc(Cl)c3	C14H6Cl2O2	277.109	193.4329091	-0.12678	2.47070235	477.915143	2.696370049	0.088	http://zinc.docking.org/substances/ZINC000034154188/catitems/subsets/for-sale/table.html
183	COc(c1)ccc(c12)C(=O)C=CC2=O	C11H8O3	188.185	284.8367298	-0.12681	2.471277054	703.9104746	2.035633805	0.0614	http://zinc.docking.org/substances/ZINC000138945868/catitems/subsets/for-sale/table.html
184	O=c1c(=O)c(OC)cc(c1c23)cc(OC)c3c(OC)cc4c2c(=O)c(=O)c(c4)OC	C22H16O8	408.368	262.5181209	-0.12693	2.473575873	649.3584902	2.100652439	0.3672
185	Cc1cccc(c12)C(=O)C=CC2=O	C11H8O2	172.185	311.3047013	-0.12697	2.474342146	770.2743428	2.142432327	0.078	http://zinc.docking.org/substances/ZINC000014592466/catitems/subsets/for-sale/table.html
186	O=C1C=CC(=O)c(c12)c(Cl)c3c(c2Cl)cccc3	C14H6Cl2O2	277.109	193.4329091	-0.12712	2.47721567	479.1750336	2.178072574	0.1613
187	c1cccc(c12)C=C(N)C(=O)C2=O	C10H7NO2	173.173	309.5286217	-0.12712	2.47721567	766.7691521	1.736493849	0.0631
188	Cc(c1)ccc(c12)C(=O)C=CC2=O	C11H8O2	172.185	311.3047013	-0.12726	2.479897626	772.0037897	2.169145623	0.0624	http://zinc.docking.org/substances/ZINC000002526412/catitems/subsets/for-sale/table.html
189	O=C1C(=O)C(OC)=Cc(c12)cccc2	C11H8O3	188.185	284.8367298	-0.12732	2.481047035	706.693324	1.824317564	0.0674	http://zinc.docking.org/substances/ZINC000039201301/catitems/subsets/for-sale/table.html
190	COc1cccc(c12)C(=O)C(=O)C=C2	C11H8O3	188.185	284.8367298	-0.12734	2.481430172	706.8024554	2.522251033	0.0608	http://zinc.docking.org/substances/ZINC000039208746/catitems/subsets/for-sale/table.html
191	c1cccc(c1c23)c(OC)cc2C(=O)C=CC3=O	C15H10O3	238.245	224.9868833	-0.12736	2.481813308	558.3754412	2.53848677	0.1451	http://zinc.docking.org/substances/ZINC000038590391/catitems/subsets/for-sale/table.html
192	Clc1c(Cl)cc(Cl)c(c12)C(=O)c3c(C2=O)cccc3	C14H5Cl3O2	311.554	172.0472213	-0.1274	2.482579581	427.1209186	2.783939945	0.1606	http://zinc.docking.org/substances/ZINC000039234022/catitems/subsets/for-sale/table.html
193	CC1=C(C)C(=O)C(=O)C(C)=C1C	C10H12O2	164.206	326.4314337	-0.1274	2.482579581	810.392012	1.79857233	0.0651	http://zinc.docking.org/substances/ZINC000077921965/catitems/subsets/for-sale/table.html
194	c1c(Cl)c(Cl)cc(c12)C(=O)c3c(C2=O)cccc3	C14H6Cl2O2	277.109	193.4329091	-0.12754	2.485261537	480.731369	2.167987436	0.0395	http://zinc.docking.org/substances/ZINC000004031920/catitems/subsets/for-sale/table.html
195	Clc1cccc(c12)c3c(C(=O)C2=O)c(Cl)ccc3	C14H6Cl2O2	277.109	193.4329091	-0.12755	2.485453105	480.7684246	1.618066205	0.0423
196	CC1=CC(=O)C(=O)c(c12)cccc2	C11H8O2	172.185	311.3047013	-0.12772	2.488709766	774.7470502	2.339328488	0.0535	http://zinc.docking.org/substances/ZINC000001593650/catitems/subsets/for-sale/table.html
197	c1c(N)c(N)cc(c1=2)=C(N)C(=O)C(=O)C2N	C10H10N4O2	218.217	245.6362245	-0.12775	2.48928447	611.458439	2.100895234	0.0798
198	O=C1C=CC(=O)c(c1c23)ccc3ccc4c2cccc4	C18H10O2	258.279	207.5352623	-0.12777	2.489667607	516.6938198	2.948108046	0.6793	http://zinc.docking.org/substances/ZINC000002558834/catitems/subsets/for-sale/table.html
199	Nc1cccc(c1c23)c4c(C(=O)C=CC4=O)c2cccc3N	C18H12N2O2	288.309	185.9185804	-0.12785	2.491200153	463.1603959	2.146413349	0.1289
200	Nc1ccc(N)c(c1c23)c(=O)c(=O)c3c(=O)c(=O)c4c2c(N)ccc4N	C18H12N4O4	348.321	307.7735767	-0.12799	2.493882109	767.5510164	1.923417697	0.1166
201	c1cc(C)cc(c12)C=CC(=O)C2=O	C11H8O2	172.185	311.3047013	-0.12806	2.495223086	776.7746776	2.11999072	0.0597	http://zinc.docking.org/substances/ZINC000104681147/catitems/subsets/for-sale/table.html
202	O=C1C(=O)C(N)=CC=C1N	C6H6N2O2	138.127	388.0631593	-0.12808	2.495606223	968.4528352	1.576781487	0.0767
203	COc1c(OC)ccc(c12)C(=O)C(=O)C=C2	C12H10O4	218.211	245.6429786	-0.12817	2.497330337	613.4516626	2.668766761	0.0616	http://zinc.docking.org/substances/ZINC000062721656/catitems/subsets/for-sale/table.html
204	CC1=C(C)C(=O)C=C(C)C1=O	C9H10O2	150.179	356.9207412	-0.12844	2.50250268	893.1951114	2.156397144	0.0764	http://zinc.docking.org/substances/ZINC000000572112/catitems/subsets/for-sale/table.html
205	Clc1ccc(Cl)c(c12)C(=O)c3c(C2=O)c(Cl)ccc3Cl	C14H4Cl4O2	345.999	154.9195229	-0.12855	2.504609931	388.0129755	1.982870762	0.0853	http://zinc.docking.org/substances/ZINC000005543460/catitems/subsets/for-sale/table.html
206	COc1ccc(OC)c(c12)c3c(c(=O)ccc3=O)c4c2c(=O)ccc4=O	C20H12O6	348.315	307.7788783	-0.12858	2.505184636	771.0429171	2.122900515	0.1317
207	Nc1ccc(N)c(c1c23)c(=O)c(=O)c2c(=O)c4c(c3=O)c(N)ccc4N	C18H12N4O4	348.321	307.7735767	-0.12868	2.507100318	771.6192321	2.052842228	0.8795
208	O=C1C(=O)C(C)=Cc(c12)cccc2	C11H8O2	172.185	311.3047013	-0.12874	2.508249728	780.8299323	2.152876686	0.0648	http://zinc.docking.org/substances/ZINC000039206121/catitems/subsets/for-sale/table.html
209	COc1ccc(OC)c(c1c23)c(=O)c(=O)c3c(=O)c(=O)c4c2c(OC)ccc4OC	C22H16O8	408.368	262.5181209	-0.12875	2.508441296	658.5112954	2.095749547	1.1409
210	COc(c1)ccc(c12)C=CC(=O)C2=O	C11H8O3	188.185	284.8367298	-0.12884	2.51016541	714.9873067	1.898463272	0.0543	http://zinc.docking.org/substances/ZINC000146533843/catitems/subsets/for-sale/table.html
211	COc1ccc(OC)c(c1c23)c(=O)c(=O)c2c(=O)c4c(c3=O)c(OC)ccc4OC	C22H16O8	408.368	262.5181209	-0.12914	2.515912458	660.4726108	2.17750818	0.11
212	Clc1c(Cl)c(Cl)cc(c12)C(=O)c3c(C2=O)cccc3	C14H5Cl3O2	311.554	172.0472213	-0.12918	2.516678731	432.9875826	2.408608301	0.1452	http://zinc.docking.org/substances/ZINC000039427241/catitems/subsets/for-sale/table.html
213	Cc(c1)ccc(c12)C=CC(=O)C2=O	C11H8O2	172.185	311.3047013	-0.12923	2.517636572	783.7521011	1.965196509	0.063	http://zinc.docking.org/substances/ZINC000034203391/catitems/subsets/for-sale/table.html
214	c1c(Cl)ccc(c12)C(=O)c3c(C2=O)ccc(Cl)c3	C14H6Cl2O2	277.109	193.4329091	-0.12928	2.518594414	487.1790443	2.239420563	0.0397	http://zinc.docking.org/substances/ZINC000004783159/catitems/subsets/for-sale/table.html
215	COc(c1=O)c(OC)c(=O)c(c12)cc3c(c2)cc4c(c3)c(=O)c(OC)c(c4=O)OC	C22H16O8	408.368	262.5181209	-0.12936	2.52012696	661.5789939	2.045428157	0.0503
216	Clc1ccc(Cl)c(c12)C(=O)c3c(C2=O)cc(Cl)cc3	C14H5Cl3O2	311.554	172.0472213	-0.12943	2.521467937	433.8115522	2.658079005	0.1155	http://zinc.docking.org/substances/ZINC000147008685/catitems/subsets/for-sale/table.html
217	c1c(Cl)ccc(c12)C(=O)c3c(C2=O)cc(Cl)cc3	C14H6Cl2O2	277.109	193.4329091	-0.12956	2.523958325	488.2166012	2.239420563	0.04	http://zinc.docking.org/substances/ZINC000004016626/catitems/subsets/for-sale/table.html
218	Cc1cc(C)c(c2c13)c(=O)c(=O)c4c2c(c(=O)c3=O)c(C)cc4C	C20H14O4	318.332	336.7679027	-0.12983	2.529130668	851.7300306	2.106946832	0.1851
219	Clc1c(Cl)c(Cl)c(Cl)c(c12)C(=O)c3c(C2=O)cccc3	C14H4Cl4O2	345.999	154.9195229	-0.13021	2.536410261	392.9394676	2.108208704	0.2117	http://zinc.docking.org/substances/ZINC000003897244/catitems/subsets/for-sale/table.html
220	c12c3c4c(=O)c(=O)c1c(N)cc(N)c2c(=O)c(=O)c3c(N)cc4N	C16H10N4O4	322.283	332.6393263	-0.13022	2.53660183	843.7735237	2.143476282	0.0447
221	Cc1cccc(c12)C(=O)C(=O)C=C2	C11H8O2	172.185	311.3047013	-0.1304	2.540050058	790.7295247	2.837561981	0.058	http://zinc.docking.org/substances/ZINC000039208744/catitems/subsets/for-sale/table.html
222	NC1=CC(=O)C=CC1=O	C6H5NO2	123.112	435.3921632	-0.13044	2.540816331	1106.251519	1.800667466	0.0743	http://zinc.docking.org/substances/ZINC000104564275/catitems/subsets/for-sale/table.html
223	c12c3c4c(=O)c(=O)c1cc(N)cc2c(=O)c(=O)c3cc(c4)N	C16H8N2O4	292.253	366.8191601	-0.13048	2.541582604	932.3011962	2.070404751	0.0421
224	c1cccc(cc2)c1c(c2c34)ccc3C(=O)C=CC4=O	C18H10O2	258.279	207.5352623	-0.13062	2.54426456	528.0246128	2.901549236	0.2266	http://zinc.docking.org/substances/ZINC000002539285/catitems/subsets/for-sale/table.html
225	c1cccc(c12)C(=O)C=CC2=O	C10H6O2	158.158	338.9142503	-0.13104	2.552310427	865.0143748	1.608679292	0.0592	http://zinc.docking.org/substances/ZINC000000901405/catitems/subsets/for-sale/table.html
226	c1cccc(cc2)c1c(c2c34)ccc4C=CC(=O)C3=O	C18H10O2	258.279	207.5352623	-0.13112	2.553842973	530.0124712	3.512338457	0.0578	http://zinc.docking.org/substances/ZINC000001847349/catitems/subsets/for-sale/table.html
227	c1c(Cl)c(Cl)cc(C2=O)c1C(=O)c(c23)c(Cl)c4c(c3Cl)cc(Cl)c(Cl)c4	C18H4Cl6O2	464.949	115.2857625	-0.13114	2.554226109	294.4659046	3.135077735	0.2284	http://zinc.docking.org/substances/ZINC000081224017/catitems/subsets/for-sale/table.html
228	COC(C1=O)=C(OC)C=CC1=O	C8H8O4	168.151	318.7730076	-0.13114	2.554226109	814.2183389	2.099561777	0.0802	http://zinc.docking.org/substances/ZINC000144657362/catitems/subsets/for-sale/table.html
229	COC1=CC=C(C(=O)C1=O)OC	C8H8O4	168.151	318.7730076	-0.13115	2.554417677	814.2794057	1.651841793	0.0802	http://zinc.docking.org/substances/ZINC000238385361/catitems/subsets/for-sale/table.html
230	c1c(N)c(N)cc(c2=O)c1c(=O)c(c23)c(=O)c4c(c3=O)cc(N)c(c4)N	C18H12N4O4	348.321	307.7735767	-0.13119	2.55518395	786.4181036	2.115385795	0.1719
231	c1cccc(c1c23)C(=O)C(=O)c2cc(Cl)cc3	C14H7ClO2	242.664	220.88979	-0.13125	2.55633336	564.6679391	2.36404848	0.7712	http://zinc.docking.org/substances/ZINC000001674717/catitems/subsets/for-sale/table.html
232	O=c1ccc(=O)c(c1c23)c(OC)c(OC)c3c(OC)c(OC)c4c2c(=O)ccc4=O	C22H16O8	408.368	262.5181209	-0.13125	2.55633336	671.0838301	2.170962856	1.0256
233	O=C1C(=O)C=C(Cl)c(c12)cc3c(c2)cccc3	C14H7ClO2	242.664	220.88979	-0.13135	2.558249043	565.0910938	2.153309356	0.042
234	COC1=C(OC)C(=O)C=CC1=O	C8H8O4	168.151	318.7730076	-0.13154	2.561888839	816.6610105	1.795345539	0.0874	http://zinc.docking.org/substances/ZINC000001686871/catitems/subsets/for-sale/table.html
235	CC1=C(C)C(=O)C(=O)C=C1C	C9H10O2	150.179	356.9207412	-0.13159	2.562846681	914.7331369	2.45449996	0.0617	http://zinc.docking.org/substances/ZINC000196828284/catitems/subsets/for-sale/table.html
236	Nc1c(N)c(N)c(N)c(c12)c3c(c(=O)ccc3=O)c4c2c(=O)ccc4=O	C18H12N4O4	348.321	307.7735767	-0.13163	2.563612954	789.012328	2.08177761	0.4837
237	O=c1c(=O)c(N)cc(cc2N)c1c(c23)c(N)cc4c3c(=O)c(=O)c(c4)N	C18H12N4O4	348.321	307.7735767	-0.13189	2.568593728	790.5452789	2.156104396	0.213
238	c1cccc(c12)C=CC(=O)C2=O	C10H6O2	158.158	338.9142503	-0.13194	2.56955157	870.8576438	1.578678008	0.0605	http://zinc.docking.org/substances/ZINC000001700208/catitems/subsets/for-sale/table.html
239	CC1=C(C)C=C(C)C(=O)C1=O	C9H10O2	150.179	356.9207412	-0.13231	2.576639595	919.6561141	2.105376467	0.0892	http://zinc.docking.org/substances/ZINC000196357958/catitems/subsets/for-sale/table.html
240	c1cccc(c1c23)ccc2C(=O)C=CC3=O	C14H8O2	208.219	257.4308781	-0.13282	2.586409576	665.8216883	2.435652527	0.1584	http://zinc.docking.org/substances/ZINC000001734353/catitems/subsets/for-sale/table.html
241	CC1=CC(=O)C(C)=CC1=O	C8H8O2	136.152	393.6923439	-0.13336	2.596754262	1022.322272	1.87014961	0.0789	http://zinc.docking.org/substances/ZINC000001706874/catitems/subsets/for-sale/table.html
242	CC1=CC(=O)C=C(C)C1=O	C8H8O2	136.152	393.6923439	-0.1335	2.599436218	1023.378137	1.918890321	0.0719	http://zinc.docking.org/substances/ZINC000001758822/catitems/subsets/for-sale/table.html
243	COC(C1=O)=CC(=O)C=C1	C7H6O3	138.124	388.0715878	-0.13353	2.600010922	1008.990367	1.81128453	0.0717	http://zinc.docking.org/substances/ZINC000001603220/catitems/subsets/for-sale/table.html
244	c1cccc(c1c23)ccc3C=CC(=O)C2=O	C14H8O2	208.219	257.4308781	-0.13365	2.602309741	669.9148818	2.792393153	0.0625	http://zinc.docking.org/substances/ZINC000001704980/catitems/subsets/for-sale/table.html
245	COc1ccc(OC)c(c2=O)c1c(=O)c(c23)c(=O)c4c(c3=O)c(OC)ccc4OC	C22H16O8	408.368	262.5181209	-0.13367	2.602692878	683.2540436	2.047255441	0.6005
246	O=c1ccc(=O)c(c2OC)c1c(OC)c(c23)c(OC)c4c(c3OC)c(=O)ccc4=O	C22H16O8	408.368	262.5181209	-0.13368	2.602884446	683.3043337	2.030344919	0.2519
247	O=c1ccc(=O)c(c(C)c2C)c1c(c23)c(=O)ccc3=O	C16H10O4	266.256	402.635058	-0.13417	2.612271291	1051.792003	2.126124634	0.4864
248	CC1=C(C)C(=O)C=CC1=O	C8H8O2	136.152	393.6923439	-0.13422	2.613229132	1028.808302	1.562417387	0.0685	http://zinc.docking.org/substances/ZINC000001594712/catitems/subsets/for-sale/table.html
249	O=C1C(Cl)=C(Cl)C(=O)c(c12)cc3c(c2)cccc3	C14H6Cl2O2	277.109	193.4329091	-0.13436	2.615911088	506.0032916	2.014258454	0.0493
250	Clc1cccc(c12)C(=O)C=CC2=O	C10H5ClO2	192.603	278.3030379	-0.13438	2.616294224	728.1226306	1.867971697	0.0566	http://zinc.docking.org/substances/ZINC000038416484/catitems/subsets/for-sale/table.html
251	Nc1ccc(N)c(c12)cc=3c(c2)=C(N)C(=O)C(=O)C3N	C14H12N4O2	268.277	199.800952	-0.13447	2.618018338	523.0825564	1.986728239	0.0781
252	O=C1C(N)=CC=CC1=O	C6H5NO2	123.112	435.3921632	-0.13455	2.619550884	1140.531926	2.198575181	0.0691	http://zinc.docking.org/substances/ZINC000059325709/catitems/subsets/for-sale/table.html
253	O=c1c(N)c(N)c(=O)c(c12)c(=O)c3c(c2=O)c(N)ccc3N	C14H10N4O4	298.26	359.4313686	-0.13458	2.620125589	941.7553264	2.121364301	0.1754
254	c1cccc(c2C)c1c(C)c(c23)ccc4c3C=CC(=O)C4=O	C20H14O2	286.333	187.2016149	-0.13467	2.621849704	490.8144985	3.401417047	0.0735	http://zinc.docking.org/substances/ZINC000033650461/catitems/subsets/for-sale/table.html
255	O=c1ccc(=O)c(c2C)c1c(C)c(c23)c(C)c4c(c3C)c(=O)ccc4=O	C22H16O4	344.37	311.3047013	-0.13502	2.628554593	818.2814023	2.101479128	0.3003
256	O=c1c(=O)c(OC)cc2ccc(c3c12)cc(c(=O)c3=O)OC	C16H10O6	298.255	359.4373942	-0.13519	2.631811253	945.9713788	2.124873368	0.183
257	Nc1ccc(N)c(c(=O)c2=O)c1c(c23)c(=O)c(=O)c4c3c(N)ccc4N	C18H12N4O4	348.321	307.7735767	-0.13531	2.634110072	810.7094783	1.905179451	0.6433
258	O=c1ccc(=O)c2c(OC)c(OC)c(c3c12)c(=O)ccc3=O	C16H10O6	298.255	359.4373942	-0.13535	2.634876345	947.0730875	1.96480277	0.1943
259	C1=CC(=O)C(=O)c(c1c23)ccc2cccc3	C14H8O2	208.219	257.4308781	-0.1354	2.635834186	678.5451091	2.589631511	0.0451	http://zinc.docking.org/substances/ZINC000005949045/catitems/subsets/for-sale/table.html
260	c1cccc(c2C)c1cc(c23)c4c(cc3)C(=O)C(=O)C=C4	C19H12O2	272.306	196.8447262	-0.13545	2.636792028	519.0386047	3.51229922	0.0502	http://zinc.docking.org/substances/ZINC000006069453/catitems/subsets/for-sale/table.html
261	c1cccc(c2C)c1cc3ccc(c4c23)C(=O)C(=O)C=C4	C19H12O2	272.306	196.8447262	-0.13591	2.645604167	520.7732279	3.455224088	0.0576	http://zinc.docking.org/substances/ZINC000006069448/catitems/subsets/for-sale/table.html
262	CC1=CC(=O)C(=O)C=C1C	C8H8O2	136.152	393.6923439	-0.13602	2.647711418	1042.383714	1.642687236	0.0629	http://zinc.docking.org/substances/ZINC000036295018/catitems/subsets/for-sale/table.html
263	C1=CC(=O)C(=O)c(c1c23)ccc2cc4c(c3)cccc4	C18H10O2	258.279	207.5352623	-0.13674	2.661504333	552.3559998	2.804858853	0.0452	http://zinc.docking.org/substances/ZINC000006118874/catitems/subsets/for-sale/table.html
264	CC1=CC(C)=CC(=O)C1=O	C8H8O2	136.152	393.6923439	-0.13675	2.661695901	1047.889298	2.019484607	0.0791	http://zinc.docking.org/substances/ZINC000039203330/catitems/subsets/for-sale/table.html
265	Clc1ccc(Cl)c(c12)C(=O)C=CC2=O	C10H4Cl2O2	227.048	236.0822381	-0.13682	2.663036879	628.6957064	1.584569611	0.0601	http://zinc.docking.org/substances/ZINC000000266419/catitems/subsets/for-sale/table.html
266	Nc1ccc(N)c(c1=2)=C(N)C(=O)C(=O)C2N	C10H10N4O2	218.217	245.6362245	-0.13684	2.663420015	654.2324368	2.127674879	0.09
267	COC1=CC=CC(=O)C1=O	C7H6O3	138.124	388.0715878	-0.13701	2.666676675	1034.861452	1.787121873	0.0772	http://zinc.docking.org/substances/ZINC000038250927/catitems/subsets/for-sale/table.html
268	Clc1cccc(c1c23)C(=O)C(=O)c2cccc3Cl	C14H6Cl2O2	277.109	193.4329091	-0.13716	2.669550199	516.378861	2.003161985	0.3052
269	CC1=CC=C(C)C(=O)C1=O	C8H8O2	136.152	393.6923439	-0.13726	2.671465882	1051.735665	1.746038113	0.068	http://zinc.docking.org/substances/ZINC000039415824/catitems/subsets/for-sale/table.html
270	CC1=C(C)C=CC(=O)C1=O	C8H8O2	136.152	393.6923439	-0.13727	2.67165745	1051.811084	2.140044294	0.0616	http://zinc.docking.org/substances/ZINC000013547056/catitems/subsets/for-sale/table.html
271	c1c(Cl)c(Cl)cc(c12)C(=O)c3c(C2=O)cc(Cl)c(Cl)c3	C14H4Cl4O2	345.999	154.9195229	-0.13737	2.673573133	414.1886742	2.007108084	0.0407	http://zinc.docking.org/substances/ZINC000005002654/catitems/subsets/for-sale/table.html
272	Clc1ccc(Cl)c(c1c23)c4c(C(=O)C=CC4=O)c2c(Cl)ccc3Cl	C18H6Cl4O2	396.059	135.3384218	-0.13744	2.67491411	362.0186542	1.965277379	0.4509
273	COC1C(=O)C(=O)C(OC)=c(c=12)c3c(cccc3)c4c2cccc4	C20H14O4	318.332	168.3839513	-0.13758	2.677596066	450.8642056	2.155479916	0.1194
274	Clc1ccc(Cl)c(c1c23)C(=O)C(=O)c2c(Cl)ccc3Cl	C14H4Cl4O2	345.999	154.9195229	-0.13769	2.679703317	415.1383594	2.084612488	0.3672
275	c1c(Cl)ccc(c12)C(=O)C=CC2=O	C10H5ClO2	192.603	278.3030379	-0.13773	2.68046959	745.9828299	1.953478463	0.0602	http://zinc.docking.org/substances/ZINC000039256956/catitems/subsets/for-sale/table.html
276	c1cc(Cl)cc(c1c23)C(=O)C(=O)c2cc(Cl)cc3	C14H6Cl2O2	277.109	193.4329091	-0.13782	2.682193704	518.824531	2.192280967	0.0456	http://zinc.docking.org/substances/ZINC000001674732/catitems/subsets/for-sale/table.html
277	Cc1ccc(C)c(c12)c3c(c(=O)ccc3=O)c4c2c(=O)ccc4=O	C20H12O4	316.316	338.9142503	-0.13785	2.682768409	909.2284441	2.128613362	0.3553
278	c1cccc(c12)C(=O)C=C(Cl)C2=O	C10H5ClO2	192.603	278.3030379	-0.13794	2.684492523	747.1024244	1.888784453	0.0851	http://zinc.docking.org/substances/ZINC000000901831/catitems/subsets/for-sale/table.html
279	Cc1ccc(C)c(c12)c(=O)c3c(c2=O)c(=O)c4c(c3=O)c(C)ccc4C	C22H16O4	344.37	311.3047013	-0.13804	2.686408206	836.2915041	1.992548897	0.4797
280	c12c3c4c(=O)c(=O)c1cc(OC)cc2c(=O)c(=O)c3cc(c4)OC	C18H10O6	322.277	332.6455192	-0.13812	2.687940752	894.131447	1.963354454	0.0421
281	COc(c1=O)c(OC)c(=O)c(c12)cc3c(c2)cc4c(c3)c(=O)ccc4=O	C20H12O6	348.315	307.7788783	-0.13813	2.68813232	827.3503502	2.179976873	0.0454
282	c1ccc(N)c(c2=O)c1c(=O)c(c23)c(=O)c4c(c3=O)cccc4N	C18H10N2O4	318.291	336.8112828	-0.13831	2.691580549	906.5546974	2.12952746	0.1786
283	COC(=C1)C=CC(=O)C1=O	C7H6O3	138.124	388.0715878	-0.13856	2.696369755	1046.384492	1.798827261	0.0674	http://zinc.docking.org/substances/ZINC000005997715/catitems/subsets/for-sale/table.html
284	c1ccc(N)c(c2=O)c1c(=O)c(c23)c(=O)c4c(c3=O)c(N)ccc4	C18H10N2O4	318.291	336.8112828	-0.13871	2.699243279	909.1355914	2.12952746	0.1839
285	c1cc(Cl)cc(c12)C=CC(=O)C2=O	C10H5ClO2	192.603	278.3030379	-0.13888	2.702499939	752.113943	2.098166245	0.0645	http://zinc.docking.org/substances/ZINC000060232538/catitems/subsets/for-sale/table.html
286	Nc1cccc(c1=2)=C(N)C(=O)C(=O)C2N	C10H9N3O2	203.202	263.7867738	-0.13904	2.705565031	713.6922709	2.155065925	0.1728
287	c1cccc(c1=2)=C(N)C(=O)C(=O)C2N	C10H8N2O2	188.187	284.8337026	-0.13905	2.7057566	770.6906706	1.462089342	0.0544
288	c1cccc(c1c2=3)ccc2=C(N)C(=O)C(=O)C3N	C14H10N2O2	238.248	224.9840502	-0.1391	2.706714441	608.9675777	2.178096935	0.8054
289	c1c(N)c(N)cc(c(=O)c2=O)c1c(c23)c(=O)c(=O)c4c3cc(N)c(c4)N	C18H12N4O4	348.321	307.7735767	-0.13914	2.707480714	833.2910232	2.085861846	0.1406
290	CC1=CC(=O)C=CC1=O	C7H6O2	122.125	438.9109519	-0.13917	2.708055419	1188.595182	1.628112732	0.0724	http://zinc.docking.org/substances/ZINC000000080829/catitems/subsets/for-sale/table.html
291	COc(c1=O)c(OC)c(=O)c(c12)cc3c(c2)c(=O)c(OC)c(c3=O)OC	C18H14O8	358.307	299.1959409	-0.13933	2.711120511	811.1562521	2.006937753	0.0623
292	C1=CC(=O)C(=O)c(c12)cccc2Cl	C10H5ClO2	192.603	278.3030379	-0.13942	2.712844625	754.9929005	2.348632071	0.0571	http://zinc.docking.org/substances/ZINC000039208745/catitems/subsets/for-sale/table.html
293	c1c(Cl)ccc(c12)C=CC(=O)C2=O	C10H5ClO2	192.603	278.3030379	-0.13942	2.712844625	754.9929005	1.976953418	0.067	http://zinc.docking.org/substances/ZINC000104683304/catitems/subsets/for-sale/table.html
294	c1cccc(c12)C(Cl)=CC(=O)C2=O	C10H5ClO2	192.603	278.3030379	-0.13944	2.713227762	755.0995286	2.141384812	0.0568	http://zinc.docking.org/substances/ZINC000002552024/catitems/subsets/for-sale/table.html
295	Nc1ccc(N)c(c12)c3c(c(=O)ccc3=O)c4c2c(=O)ccc4=O	C18H10N2O4	318.291	336.8112828	-0.14005	2.724913425	917.7815863	2.194540567	0.3961
296	O=c1c(C)c(C)c(=O)c(c12)c(C)c3c(c2C)c(=O)ccc3=O	C18H14O4	294.31	364.255377	-0.14013	2.726445971	993.1226052	2.181272684	0.5294
297	O=c1c(=O)c(OC)c(OC)c2c(=O)c(=O)c(c3c12)c(OC)ccc3OC	C18H14O8	358.307	299.1959409	-0.14032	2.730085768	816.8305802	2.14308344	0.1722
298	Cc1ccc(C)c(c12)c(=O)c(=O)c3c2c4c(c(=O)c3=O)c(C)ccc4C	C22H16O4	344.37	311.3047013	-0.14045	2.732576156	850.6638039	1.954781224	0.1411
299	C1C(=O)C(=O)C=c(c=12)ccc(c2)N	C10H7NO2	173.173	309.5286217	-0.14058	2.735066543	846.5813773	2.14657219	0.6524
300	Cc1ccc(C)c(c12)c(=O)c(=O)c3c2c(=O)c4c(c3=O)c(C)ccc4C	C22H16O4	344.37	311.3047013	-0.14058	2.735066543	851.4390732	1.948589208	0.8148
301	Clc1cccc(c12)C(=O)C=C(Cl)C2=O	C10H4Cl2O2	227.048	236.0822381	-0.14065	2.736407521	646.0172118	2.177889855	0.0649
302	c1cccc(c12)C=C(Cl)C(=O)C2=O	C10H5ClO2	192.603	278.3030379	-0.14088	2.740813591	762.7767486	1.905687153	0.0716	http://zinc.docking.org/substances/ZINC000038266565/catitems/subsets/for-sale/table.html
303	CC=1C(=O)C(=O)C(C)=c(c12)c(C)ccc2C	C14H14O2	214.266	250.1656819	-0.14114	2.745794365	686.9035197	1.958812166	0.1498
304	Clc1c(Cl)cc(Cl)c(c12)C(=O)C=CC2=O	C10H3Cl3O2	261.493	204.9844547	-0.14133	2.749434162	563.5912624	2.171062274	0.1216
305	COC1C(=O)C(=O)C(OC)=c(c=12)c(OC)ccc2OC	C14H14O6	278.264	192.6300204	-0.14168	2.756139051	530.9151216	1.826777515	0.2057
306	Nc1ccc(N)c(c1c23)c(=O)c(=O)c2c(=O)c(=O)cc3N	C14H9N3O4	283.246	378.4837209	-0.1418	2.75843787	1044.023829	2.006262368	0.7047
307	O=c1ccc(=O)c(cc2N)c1c(c23)c(N)cc4c3c(=O)ccc4=O	C18H10N2O4	318.291	336.8112828	-0.14204	2.763035508	930.6215339	2.122762274	0.2529
308	c1cccc(c12)C(=O)C(Cl)=C(Cl)C2=O	C10H4Cl2O2	227.048	236.0822381	-0.14207	2.763610213	652.4392843	1.743348154	0.0684	http://zinc.docking.org/substances/ZINC000000135323/catitems/subsets/for-sale/table.html
309	COC1C(=O)C(=O)C(OC)=c(c=12)ccc(c2)OC	C13H12O5	248.238	215.9298738	-0.14208	2.763801781	596.7873698	2.169316446	0.1609
310	O=c1ccc(=O)c(c1c23)ccc2c(=O)ccc3=O	C14H6O4	238.202	450.0549953	-0.14208	2.763801781	1243.862798	2.002479686	0.3719
311	CC1=CC(=O)C(=O)C=C1	C7H6O2	122.125	438.9109519	-0.14212	2.764568054	1213.399196	1.660000179	0.0598	http://zinc.docking.org/substances/ZINC000005766743/catitems/subsets/for-sale/table.html
312	CC1=CC=CC(=O)C1=O	C7H6O2	122.125	438.9109519	-0.14225	2.767058442	1214.492255	1.871715584	0.0631	http://zinc.docking.org/substances/ZINC000013542419/catitems/subsets/for-sale/table.html
313	O=c1ccc(=O)c(c(OC)c2OC)c1c3ccc(c4c23)c(=O)ccc4=O	C20H12O6	348.315	307.7788783	-0.14228	2.767633146	851.8190253	2.10337767	0.3199
314	O=c1c(=O)ccc(c1c23)ccc3ccc(=O)c2=O	C14H6O4	238.202	450.0549953	-0.14247	2.771272943	1247.225231	2.160301162	0.341
315	c1c(Cl)c(Cl)cc(c12)C(=O)C=CC2=O	C10H4Cl2O2	227.048	236.0822381	-0.14255	2.772805489	654.6101257	2.010654697	0.0583	http://zinc.docking.org/substances/ZINC000001726276/catitems/subsets/for-sale/table.html
316	Nc1ccc(N)c(c1c23)c(=O)c(=O)c2c(=O)c(N)c(c3=O)N	C14H10N4O4	298.26	359.4313686	-0.14279	2.777403127	998.2858072	2.184288393	0.6221
317	Clc1c(Cl)c(Cl)c(Cl)c(c12)C(=O)C=CC2=O	C10H2Cl4O2	295.938	181.1257763	-0.14367	2.794261134	506.1127171	1.610616402	0.1733
318	c1c(Cl)c(Cl)cc(c12)C=CC(=O)C2=O	C10H4Cl2O2	227.048	236.0822381	-0.14374	2.795602112	659.9920034	2.010011826	0.0615
319	Clc1cccc(c12)C(=O)C(Cl)=C(Cl)C2=O	C10H3Cl3O2	261.493	204.9844547	-0.14471	2.814184233	576.8640203	2.20481244	0.069	http://zinc.docking.org/substances/ZINC000196127792/catitems/subsets/for-sale/table.html
320	O=c1ccc(=O)c(c1c23)c(Cl)cc3cc(Cl)c4c2c(=O)ccc4=O	C18H6Cl2O4	357.152	300.1635158	-0.14478	2.81552521	845.117946	2.033746504	0.3687
321	c12c3c4c(=O)c(=O)c1cccc2c(=O)c(=O)c3ccc4	C16H6O4	262.224	408.8260419	-0.14495	2.818781871	1152.391435	1.889597496	0.039	http://zinc.docking.org/substances/ZINC000034396246/catitems/subsets/for-sale/table.html
322	O=c1ccc(=O)c(c12)cc3c(c2)cc4c(c3)c(=O)ccc4=O	C18H8O4	288.262	371.8977874	-0.14502	2.820122849	1048.797448	2.145424142	0.0357
323	c1cccc(c12)C(Cl)=C(Cl)C(=O)C2=O	C10H4Cl2O2	227.048	236.0822381	-0.14505	2.820697553	665.9165914	2.102664003	0.0617	http://zinc.docking.org/substances/ZINC000003882869/catitems/subsets/for-sale/table.html
324	O=C1C=CC(=O)C=C1	C6H4O2	108.098	495.8648634	-0.14518	2.823187941	1399.919703	1.291358655	0.0693	http://zinc.docking.org/substances/ZINC000000895247/catitems/subsets/for-sale/table.html
325	COc(cc1)cc(c2=O)c1c(=O)c(c23)c(=O)c4c(c3=O)cc(cc4)OC	C20H12O6	348.315	307.7788783	-0.14526	2.824720487	869.3893029	2.066374158	0.1555
326	CC=1C(=O)C(=O)C(C)=c(c12)ccc(C)c2	C13H12O2	200.239	267.6901103	-0.1454	2.827402442	756.8676716	2.063529783	0.0485
327	O=c1ccc(=O)c(c1c23)cc(Cl)c2c(=O)ccc3=O	C14H5ClO4	272.647	393.1970643	-0.14584	2.835831446	1115.040599	2.007484781	0.4262
328	COc1ccc(OC)c(c12)c(=O)c(=O)c3c2cc(c(=O)c3=O)OC	C17H12O7	328.281	326.5616956	-0.14621	2.842919471	928.3886029	2.16566704	0.5046
329	COc(c1=O)c(OC)c(=O)c(c12)c(=O)c3c(c2=O)cc4c(c3)cccc4	C20H12O6	348.315	307.7788783	-0.14634	2.845409858	875.7570545	2.174127173	0.2115
330	CC=1C(=O)C(=O)C(C)=c(c12)cccc2C	C13H12O2	200.239	267.6901103	-0.14641	2.846750836	762.0470453	2.093214313	0.1609
331	O=c1c(=O)cc(OC)c(c12)c(=O)c3c(c2=O)c(OC)ccc3OC	C17H12O7	328.281	326.5616956	-0.1465	2.84847495	930.2028097	2.131733622	0.7527
332	Cc1ccc(C)c(c12)c(=O)c(=O)c3c4c(c(=O)c(c23)=O)c(C)ccc4C	C22H16O4	344.37	311.3047013	-0.14667	2.851731611	887.7574573	1.877488912	0.1729
333	Clc1ccc(Cl)c(c12)C(=O)C(Cl)=C(Cl)C2=O	C10H2Cl4O2	295.938	181.1257763	-0.14669	2.852114747	516.5914977	1.906974529	0.0669
334	NC1C(=O)C(=O)C(N)=c(c=12)cc3c(c2)cccc3	C14H10N2O2	238.248	224.9840502	-0.14671	2.852497884	641.7665271	1.84821281	0.0479
335	Clc1ccc(Cl)c(c1c23)c=4c(=CC(=O)C(=O)C4)c2c(Cl)ccc3Cl	C18H6Cl4O2	396.059	135.3384218	-0.14677	2.853647293	386.2081211	2.128993581	0.8989
336	O=c1ccc(=O)c(c1c23)c(Cl)cc3c(Cl)cc4c2c(=O)ccc4=O	C18H6Cl2O4	357.152	300.1635158	-0.14682	2.854605135	856.8483134	2.016781118	0.3501
337	COc1c(=O)c(=O)cc2c(OC)c(OC)c(c3c12)cc(=O)c(=O)c3OC	C18H14O8	358.307	299.1959409	-0.14696	2.85728709	854.8886994	2.11767118	0.0871
338	COc1ccc(OC)c(c1=2)=CC(=O)C(=O)C2	C12H10O4	218.211	245.6429786	-0.14699	2.857861795	702.0136837	2.163519182	0.6531
339	O=c1ccc(=O)c(c2C)c1c(C)c(c23)c(=O)ccc3=O	C16H10O4	266.256	402.635058	-0.147	2.858053363	1150.752482	1.971770813	0.1788
340	Clc1ccc(Cl)c(c12)C(Cl)=CC(=O)C2=O	C10H3Cl3O2	261.493	204.9844547	-0.1473	2.863800411	587.0345656	2.189508523	0.1353
341	O=C1C(=O)C=CC=C1	C6H4O2	108.098	495.8648634	-0.14733	2.864375116	1420.342975	1.381278025	0.0606	http://zinc.docking.org/substances/ZINC000001529413/catitems/subsets/for-sale/table.html
342	O=c1ccc(=O)c(c2OC)c1c(OC)c(c23)c(=O)ccc3=O	C16H10O6	298.255	359.4373942	-0.14744	2.866482366	1030.320952	1.924676924	0.1702
343	C1=C(Cl)C(=O)C(=O)c(c12)cccc2Cl	C10H4Cl2O2	227.048	236.0822381	-0.1476	2.869547459	677.4491864	2.183555456	0.069
344	O=c1ccc(=O)c(c1c23)c(Cl)c(Cl)c2c(=O)ccc3=O	C14H4Cl2O4	307.092	349.0940826	-0.14766	2.870696868	1002.14329	2.026381373	0.3036
345	O=c1ccc(=O)c(c1c23)c4c(c(Cl)ccc4Cl)c2c(=O)ccc3=O	C18H6Cl2O4	357.152	300.1635158	-0.14773	2.872037846	862.0809773	1.910148324	0.6073
346	COc(c1=O)c(OC)c(=O)c(c12)cc3c(c2)c(=O)ccc3=O	C16H10O6	298.255	359.4373942	-0.1478	2.873378824	1032.799797	2.070901008	0.0526
347	COC1C(=O)C(=O)C(OC)=c(c=12)cccc2	C12H10O4	218.211	245.6429786	-0.14786	2.874528233	706.1076773	1.874863315	0.0917
348	c1c(N)c(=O)c(=O)c(c1c23)ccc2c(=O)c(=O)c(c3)N	C14H8N2O4	268.231	399.6704333	-0.14807	2.878551167	1150.471792	2.118804583	0.0464
349	c1c(Cl)ccc(c12)C(=O)C(Cl)=C(Cl)C2=O	C10H3Cl3O2	261.493	204.9844547	-0.14816	2.880275281	590.4116578	2.299558795	0.0699	http://zinc.docking.org/substances/ZINC000039260298/catitems/subsets/for-sale/table.html
350	O=c1c(=O)c(N)cc(c12)cc(N)c(=O)c2=O	C10H6N2O4	218.17	491.378283	-0.14835	2.883915078	1417.093239	2.165064278	0.0604
351	Cc(c1)c(C)cc(c1=2)=CC(=O)C(=O)C2	C12H10O2	186.212	287.8547032	-0.14852	2.887171738	831.0859638	2.171881314	0.0445
352	COc(cc1)cc2c1c(=O)c(=O)c(c23)c(=O)c4c(c3=O)ccc(c4)OC	C20H12O6	348.315	307.7788783	-0.1489	2.894451332	890.8509842	2.192021265	0.7669
353	O=c1ccc(=O)c(c1c23)c4c(c(=O)ccc4=O)c2c(Cl)cc(Cl)c3Cl	C18H5Cl3O4	391.597	273.7610349	-0.14899	2.896175446	792.8599874	2.187531921	0.5593
354	C1C(=O)C(=O)C=c(c=12)c(N)ccc2N	C10H8N2O2	188.187	284.8337026	-0.1491	2.898282697	825.5285918	1.840445927	0.0572
355	O=c1ccc(=O)c(c2Cl)c1c(Cl)c(c23)c(Cl)c4c(c3Cl)c(=O)ccc4=O	C18H4Cl4O4	426.042	251.6277738	-0.14922	2.900581516	729.8668696	2.068683391	0.1394
356	O=c1ccc(=O)c(c1c23)c(Cl)c(Cl)c3c(Cl)c(Cl)c4c2c(=O)ccc4=O	C18H4Cl4O4	426.042	251.6277738	-0.14962	2.908244246	731.7950254	2.070494283	1.3908
357	CC=1C(=O)C(=O)C(C)=c(c12)cccc2	C12H10O2	186.212	287.8547032	-0.14962	2.908244246	837.1517843	1.790534466	0.0475
358	c1c(Cl)c(Cl)cc(c12)C(Cl)=CC(=O)C2=O	C10H3Cl3O2	261.493	204.9844547	-0.14985	2.912650316	597.0480368	2.152951984	0.0575
359	O=c1c(N)c(N)c(=O)c(c12)c(=O)c(N)c(c2=O)N	C10H8N4O4	248.2	431.9258662	-0.15005	2.916481681	1259.703876	2.068332747	0.1239
360	COc(c1)ccc(c1=2)=CC(=O)C(=O)C2	C11H8O3	188.185	284.8367298	-0.15009	2.917247954	830.9393673	1.735005321	0.0551
361	c12c3c4c(=O)c(=O)c1c(Cl)cc(Cl)c2c(=O)c(=O)c3c(Cl)cc4Cl	C16H2Cl4O4	400.004	268.0073199	-0.15012	2.917822659	781.9978308	1.941968581	0.2153
362	COc(cc1)cc2c1c(=O)c(=O)c(c23)c(=O)c4c(c3=O)cc(cc4)OC	C20H12O6	348.315	307.7788783	-0.15018	2.918972069	898.3979491	2.192021265	0.764
363	O=c1c(=O)c(OC)cc(c2OC)c1c(OC)c(c23)cc(c(=O)c3=O)OC	C18H14O8	358.307	299.1959409	-0.15077	2.930274596	876.7262648	2.195262126	0.1178
364	O=c1c(N)c(N)c(=O)c(c12)c(N)c(=O)c(=O)c2N	C10H8N4O4	248.2	431.9258662	-0.1508	2.9308493	1265.909623	1.853211173	0.0535
365	COc(cc1)cc(c2=O)c1c(=O)c(c23)c(=O)c4c(c3=O)ccc(c4)OC	C20H12O6	348.315	307.7788783	-0.15081	2.931040869	902.1124708	2.066374158	0.0609
366	Nc1c(=O)c(=O)c(N)c(c12)c(=O)c(=O)c(N)c2N	C10H8N4O4	248.2	431.9258662	-0.1509	2.932764983	1266.737056	1.991021663	0.6685
367	c1cccc(c2=O)c1c(=O)c(c23)c(=O)c4c(c3=O)cccc4	C18H8O4	288.262	371.8977874	-0.15099	2.934489097	1091.330002	2.0362306	0.1647
368	c1cccc2c1c(=O)c(=O)c(c23)c(=O)c(=O)c4c3cccc4	C18H8O4	288.262	371.8977874	-0.15105	2.935638507	1091.757465	2.078288991	1.2108
369	Clc1c(Cl)c(Cl)c(Cl)c(c12)c3c(c(=O)ccc3=O)c4c2c(=O)ccc4=O	C18H4Cl4O4	426.042	251.6277738	-0.15134	2.941193986	740.0860951	1.995463759	0.5079
370	COc(c1=O)c(OC)c(=O)c(c12)c(=O)c3c(c2=O)cccc3	C16H10O6	298.255	359.4373942	-0.15143	2.942918101	1057.794813	2.01844262	0.1713
371	COC1C(=O)C(=O)C(OC)=c(c=12)cc3c(c2)cccc3	C16H12O4	268.272	199.8046759	-0.15191	2.952113377	589.8460565	2.196798838	0.0639
372	O=c1ccc(=O)c(c1c23)c(Cl)c(Cl)c2c(Cl)c4c(c3Cl)c(=O)ccc4=O	C18H4Cl4O4	426.042	251.6277738	-0.15197	2.953262786	743.1229404	2.141939609	1.1563
373	O=C1C=CC(=O)c(c12)c3c(cc(Cl)c(Cl)c3)c4c2cc(Cl)c(Cl)c4	C18H6Cl4O2	396.059	135.3384218	-0.15198	2.953454355	399.7158512	2.159334653	0.2281
374	COc1ccc(OC)c(c12)c(=O)c3c(c2=O)c(=O)ccc3=O	C16H10O6	298.255	359.4373942	-0.152	2.953837491	1061.719651	2.180418631	0.1612
375	c1c(Cl)c(Cl)cc(c12)C(=O)C(Cl)=C(Cl)C2=O	C10H2Cl4O2	295.938	181.1257763	-0.15207	2.955178469	535.2589943	2.08593525	0.0706	http://zinc.docking.org/substances/ZINC000001606683/catitems/subsets/for-sale/table.html
376	O=c1c(=O)c(Cl)cc(c1c23)cc(Cl)c2c(=O)ccc3=O	C14H4Cl2O4	307.092	349.0940826	-0.15216	2.956902583	1032.237195	2.170399136	0.3884
377	COc(c1=O)c(OC)c(=O)c(c12)c(=O)c(OC)c(c2=O)OC	C14H12O8	308.247	347.7860287	-0.15223	2.958243561	1028.83578	1.91397283	0.1624
378	O=c1c(C)c(C)c(=O)c(c12)c(=O)c3c(c2=O)cccc3	C16H10O4	266.256	402.635058	-0.15249	2.963224336	1193.098002	2.186112594	0.1841
379	O=C1C(Cl)=CC(=O)C=C1	C6H3ClO2	142.543	376.040914	-0.15257	2.964756882	1114.869888	1.583771696	0.0824	http://zinc.docking.org/substances/ZINC000001606709/catitems/subsets/for-sale/table.html
380	O=c1c(N)c(N)c(=O)c(c12)c(=O)c3c(c2=O)cccc3	C14H8N2O4	268.231	399.6704333	-0.15269	2.967055701	1185.844438	2.147665299	0.2333
381	c1cccc(c1c2=3)c4c(cccc4)c2=CC(=O)C(=O)C3Cl	C18H9ClO2	292.724	183.1144696	-0.15292	2.971461771	544.1176461	2.129371877	0.2361
382	COc(c1=O)c(OC)c(=O)c(c12)c(=O)c(=O)c3c2cccc3	C16H10O6	298.255	359.4373942	-0.15312	2.975293136	1069.431612	2.171377165	0.1593
383	Nc1c(N)c(=O)c(=O)c(c12)c(=O)c(=O)c(N)c2N	C10H8N4O4	248.2	431.9258662	-0.15317	2.976250977	1285.519781	2.050810768	0.1784
384	c1c(=O)c(=O)cc(c1c23)c(N)c(N)c2cc4c(c3)c(=O)ccc4=O	C18H10N2O4	318.291	336.8112828	-0.15322	2.977208818	1002.757521	2.199908978	0.0693
385	O=c1c(C)c(C)c(=O)c(c12)c(=O)c(C)c(C)c2=O	C14H12O4	244.249	438.9127489	-0.15344	2.98142332	1308.584705	1.884052841	0.1639
386	Cc1ccc(C)c(c12)c(=O)c(=O)c3c2c(=O)c(C)cc3=O	C17H12O4	280.283	382.4848457	-0.15346	2.981806457	1140.495782	2.158647789	0.5906
387	COc(cc1)cc2c1c(=O)c(=O)c(c23)c4c(c(=O)c3=O)ccc(c4)OC	C20H12O6	348.315	307.7788783	-0.15362	2.984871549	918.6804171	2.095957354	0.1519
388	O=c1ccc(=O)c(cc2Cl)c1c(c23)c(Cl)cc4c3c(=O)ccc4=O	C18H6Cl2O4	357.152	300.1635158	-0.15368	2.986020958	896.2945491	2.106700352	0.1808
389	O=c1c(N)c(N)c(=O)c(c12)c(=O)c(=O)c3c2cccc3	C14H8N2O4	268.231	399.6704333	-0.15369	2.986212526	1193.500854	2.172041563	0.2123
390	c1cccc(c2=O)c1c(=O)c(c23)c(=O)c(=O)c4c3cccc4	C18H8O4	288.262	371.8977874	-0.15369	2.986212526	1110.565831	2.102322362	0.2006
391	c1ccc(Cl)c(c2=O)c1c(=O)c(c23)c(=O)c4c(c3=O)c(Cl)ccc4	C18H6Cl2O4	357.152	300.1635158	-0.15388	2.989852323	897.4445851	2.144661978	0.28
392	c1ccc(Cl)c(c2=O)c1c(=O)c(c23)c(=O)c4c(c3=O)cccc4Cl	C18H6Cl2O4	357.152	300.1635158	-0.15396	2.991384869	897.9045995	2.144661978	0.2503
393	O=c1c(=O)c(Cl)cc(c1c23)ccc3cc(Cl)c(=O)c2=O	C14H4Cl2O4	307.092	349.0940826	-0.15401	2.992342711	1044.609133	2.175881006	0.187
394	COc1c(OC)c(=O)c(=O)c(c12)c(=O)c(=O)c3c2cccc3	C16H10O6	298.255	359.4373942	-0.15432	2.998281327	1077.694427	1.954494723	0.1304
395	c1cccc(c2OC)c1c(OC)c(c2=3)=C(OC)C(=O)C(=O)C3OC	C18H16O6	328.325	163.258966	-0.15435	2.998856031	489.5901349	2.13873972	0.0683
396	Cc1cc(=O)c(=O)c2c(=O)c(=O)c(c3c12)c(C)ccc3C	C17H12O4	280.283	382.4848457	-0.15447	3.00115485	1147.89625	2.031508126	0.8026
397	Cc1cccc(c1=2)=CC(=O)C(=O)C2	C11H8O2	172.185	311.3047013	-0.15463	3.004219943	935.2277918	2.198011854	0.0617
398	O=c1c(Cl)cc(=O)c(c1c23)c(Cl)c(Cl)c2c(=O)cc(Cl)c3=O	C14H2Cl4O4	375.982	285.1306711	-0.15474	3.006327193	857.1960902	2.164011087	0.2898
399	COc1c(OC)c(=O)c(=O)c(c12)c(OC)c(c(=O)c2=O)OC	C14H12O8	308.247	347.7860287	-0.15486	3.008626012	1046.358093	1.779233569	0.1905
400	O=C1C(=O)C=CC(Cl)=C1	C6H3ClO2	142.543	376.040914	-0.15491	3.009583854	1131.726663	1.89705382	0.065	http://zinc.docking.org/substances/ZINC000005133121/catitems/subsets/for-sale/table.html
401	O=c1ccc(=O)c(c1c23)c(Cl)c(Cl)c2c(Cl)c(Cl)c(=O)c3=O	C14H2Cl4O4	375.982	285.1306711	-0.15495	3.010350127	858.3431519	2.168749562	0.4498
402	O=c1ccc(=O)c(c12)c(Cl)c3c(c2Cl)c(=O)ccc3=O	C14H4Cl2O4	307.092	349.0940826	-0.1553	3.017055016	1053.236053	2.046617993	0.228
403	Cc1c(C)c(=O)c(=O)c(c12)c(C)c(=O)c(=O)c2C	C14H12O4	244.249	438.9127489	-0.15532	3.017438152	1324.392074	2.098032552	0.2563
404	O=c1ccc(=O)c(c12)cc3c(c2)c(=O)ccc3=O	C14H6O4	238.202	450.0549953	-0.15544	3.019736971	1359.047708	1.619756147	0.0428
405	Clc1ccc(Cl)c(c2=O)c1c(=O)c(c23)c(=O)c4c(c3=O)c(Cl)ccc4Cl	C18H4Cl4O4	426.042	251.6277738	-0.15548	3.020503244	760.0425071	1.888950995	0.688
406	c12c3c4c(=O)c(=O)c1cc(Cl)cc2c(=O)c(=O)c3cc(Cl)c4	C16H4Cl2O4	331.114	323.767645	-0.1556	3.022802063	978.6855054	1.727625131	0.0396
407	O=C1C(=O)C=CC=C1Cl	C6H3ClO2	142.543	376.040914	-0.1558	3.026633428	1138.138001	1.851593861	0.0739	http://zinc.docking.org/substances/ZINC000005133115/catitems/subsets/for-sale/table.html
408	O=c1ccc(=O)c(cc2Cl)c1c(c2c34)cc(Cl)c3c(=O)ccc4=O	C18H6Cl2O4	357.152	300.1635158	-0.156	3.030464794	909.634967	2.145258204	0.667
409	COc1c(OC)c(=O)c(=O)c(c12)c(OC)c(=O)c(=O)c2OC	C14H12O8	308.247	347.7860287	-0.15602	3.03084793	1054.086565	2.12072217	0.187
410	COc1c(=O)c(=O)c(OC)c(c12)c(=O)c(OC)c(c2=O)OC	C14H12O8	308.247	347.7860287	-0.15605	3.031422635	1054.286439	2.018632511	0.1119
411	Nc1ccc(N)c(c12)c(=O)c3c(c2=O)cc(=O)c(=O)c3	C14H8N2O4	268.231	399.6704333	-0.15632	3.036594978	1213.637231	1.991398289	0.0382
412	O=c1c(N)cc(=O)c(c12)c(=O)cc(c2=O)N	C10H6N2O4	218.17	491.378283	-0.1564	3.038127524	1492.869886	2.089538765	0.064
413	COc(c1=O)c(OC)c(=O)c(c12)c(OC)cc(=O)c2=O	C13H10O7	278.22	385.320969	-0.15655	3.041001048	1171.76147	2.066356087	0.1365
414	O=c1c(N)c(N)c(=O)c(c12)c(=O)c(=O)c(N)c2N	C10H8N4O4	248.2	431.9258662	-0.15681	3.045981822	1315.638337	2.133405139	0.1185
415	O=c1cc(Cl)c(=O)c(c1c23)c(Cl)c(Cl)c2c(=O)c(Cl)cc3=O	C14H2Cl4O4	375.982	285.1306711	-0.15682	3.046173391	868.5574631	2.193973355	0.4711
416	Clc1ccc(Cl)c(c1c23)c(=O)c(=O)c2c(=O)c4c(c3=O)c(Cl)ccc4Cl	C18H4Cl4O4	426.042	251.6277738	-0.15682	3.046173391	766.5018289	2.124912888	0.7913
417	c1cccc(c1=2)=CC(=O)C(=O)C2	C10H6O2	158.158	338.9142503	-0.15694	3.04847221	1033.170673	1.645977733	0.0451	http://zinc.docking.org/substances/ZINC000038251061/catitems/subsets/for-sale/table.html
418	ClC1C(=O)C(=O)C(Cl)=c(c=12)c3c(cccc3)c4c2cccc4	C18H8Cl2O2	327.169	163.8358157	-0.15742	3.057667486	500.9554467	2.033524635	0.3268
419	ClC1=C(Cl)C(=O)C=CC1=O	C6H2Cl2O2	176.988	302.8566908	-0.15749	3.059008464	926.4411805	1.454537421	0.0842	http://zinc.docking.org/substances/ZINC000001673572/catitems/subsets/for-sale/table.html
420	COc1c(OC)c(=O)c(=O)c(c12)c(=O)c(OC)c(c2=O)OC	C14H12O8	308.247	347.7860287	-0.15753	3.059774737	1064.146904	1.992748906	0.129
421	O=c1ccc(=O)c(c(Cl)c2Cl)c1c(c23)c(Cl)c(Cl)c4c3c(=O)ccc4=O	C18H4Cl4O4	426.042	251.6277738	-0.15757	3.06054101	770.1171209	2.059525295	1.1926
422	O=c1c(C)c(C)c(=O)c(c12)c(C)c(=O)c(=O)c2C	C14H12O4	244.249	438.9127489	-0.15757	3.06054101	1343.310468	2.042017521	0.1868
423	COc1c(OC)c(=O)c(=O)c(c12)c(=O)c3c(c2=O)cccc3	C16H10O6	298.255	359.4373942	-0.15757	3.06054101	1100.072885	2.041421812	0.1357
424	O=c1cc(N)c(=O)c(c12)c(=O)cc(c2=O)N	C10H6N2O4	218.17	491.378283	-0.15758	3.060732578	1503.977519	2.043900727	0.0651
425	O=c1c(=O)cc(C)c(c2=O)c1c(=O)c(c23)c(C)ccc3C	C17H12O4	280.283	382.4848457	-0.15787	3.066288057	1172.808715	2.053466724	0.5826
426	c1c(=O)c(=O)cc(c1c23)c(N)c(N)c2cc(=O)c(=O)c3	C14H8N2O4	268.231	399.6704333	-0.15805	3.069736286	1226.882832	2.002875801	0.145
427	O=c1c(=O)c(C)cc(c12)cc3c(c2)cc(C)c(=O)c3=O	C16H10O4	266.256	402.635058	-0.15816	3.071843537	1236.831901	2.193935267	0.0474
428	O=c1c(Cl)c(Cl)c(=O)c(c12)cc3c(c2)cc4c(c3)c(=O)c(Cl)c(Cl)c4=O	C18H4Cl4O4	426.042	251.6277738	-0.15835	3.075483334	773.8770246	2.016623913	0.0461
429	c1c(=O)c(=O)cc(c12)c(=O)c(N)c(c2=O)N	C10H6N2O4	218.17	491.378283	-0.15835	3.075483334	1511.22572	1.907954432	0.06
430	Cc1c(C)c(=O)c(=O)c(c12)c(=O)c(=O)c(C)c2C	C14H12O4	244.249	438.9127489	-0.15837	3.07586647	1350.037008	1.921629716	0.1484
431	O=c1ccc(=O)c(c1c23)c(Cl)c(Cl)c2c(=O)c(=O)c(Cl)c3Cl	C14H2Cl4O4	375.982	285.1306711	-0.15868	3.081805086	878.7171524	2.143289818	0.2435
432	c1cccc(c(=O)c2=O)c1c(c23)c(=O)c(=O)c4c3cccc4	C18H8O4	288.262	371.8977874	-0.15868	3.081805086	1146.116493	1.889410476	0.2283
433	O=c1c(=O)cc(Cl)c(c1c23)c4c(c(Cl)ccc4Cl)c2c(Cl)cc(=O)c3=O	C18H4Cl4O4	426.042	251.6277738	-0.15871	3.082379791	775.6123648	2.024074719	0.762
434	O=c1c(=O)c(OC)cc(c12)cc(c(=O)c2=O)OC	C12H8O6	248.194	431.9363079	-0.15905	3.088893112	1334.205086	1.992896519	0.0603
435	Cc1c(C)c(=O)c(=O)c(c12)c(=O)c(C)c(C)c2=O	C14H12O4	244.249	438.9127489	-0.15927	3.093107613	1357.604365	2.059309963	0.153
436	Clc1ccc(Cl)c(c1c23)c(=O)c(=O)c3c(=O)c(=O)c4c2c(Cl)ccc4Cl	C18H4Cl4O4	426.042	251.6277738	-0.15928	3.093299182	778.3599868	1.95285984	0.1658
437	O=C1C(Cl)=CC(=O)C(Cl)=C1	C6H2Cl2O2	176.988	302.8566908	-0.15952	3.09789682	938.2187793	1.565377688	0.0871	http://zinc.docking.org/substances/ZINC000000135776/catitems/subsets/for-sale/table.html
438	Nc1c(=O)c(=O)c(N)c(c12)c(=O)c3c(c2=O)cccc3	C14H8N2O4	268.231	399.6704333	-0.15958	3.099046229	1238.597149	2.046357614	0.0483
439	O=C1C(Cl)=CC(=O)C=C1Cl	C6H2Cl2O2	176.988	302.8566908	-0.15969	3.10115348	939.2050806	1.679084961	0.0888	http://zinc.docking.org/substances/ZINC000000155115/catitems/subsets/for-sale/table.html
440	c1c(N)c(N)cc(c12)c3c(cc(=O)c(=O)c3)c4c2cc(=O)c(=O)c4	C18H10N2O4	318.291	336.8112828	-0.15974	3.102111321	1044.826094	1.823386078	0.1934
441	c1cccc(c2=O)c1c(=O)c(c23)c(=O)c4c(c3=O)cc(Cl)c(Cl)c4	C18H6Cl2O4	357.152	300.1635158	-0.16005	3.108049937	932.9231965	2.174265123	0.1575
442	c1cc(=O)c(=O)c(c1c23)ccc2c(=O)c(=O)cc3	C14H6O4	238.202	450.0549953	-0.16013	3.109582483	1399.48313	2.007096027	0.0472
443	Cc1cc(=O)c(=O)c2c1c(=O)c(=O)c(c23)c(C)ccc3C	C17H12O4	280.283	382.4848457	-0.16013	3.109582483	1189.368176	1.891009405	0.6072
444	COc1c(OC)c(=O)c(=O)c(c12)c(=O)c(=O)c(OC)c2OC	C14H12O8	308.247	347.7860287	-0.16021	3.111115029	1082.002341	1.883543185	0.1135
445	COc(c1=O)cc(=O)c(c12)c(=O)cc(c2=O)OC	C12H8O6	248.194	431.9363079	-0.16023	3.111498166	1343.96903	2.134578815	0.0689
446	O=c1c(=O)cc(Cl)c(c12)c3c(c(=O)c(=O)cc3Cl)c4c2c(Cl)ccc4Cl	C18H4Cl4O4	426.042	251.6277738	-0.1603	3.112839144	783.2767839	2.024074719	0.497
447	O=C1C(Cl)=C(Cl)C=CC1=O	C6H2Cl2O2	176.988	302.8566908	-0.1603	3.112839144	942.744162	1.886945871	0.0703
448	COc(c1=O)cc(=O)c(c12)c(=O)c(cc2=O)OC	C12H8O6	248.194	431.9363079	-0.16049	3.116478941	1346.120407	2.199629174	0.0661
449	Clc1cc(=O)c(=O)c(c1c23)c4c(c(Cl)ccc4Cl)c2c(Cl)cc(=O)c3=O	C18H4Cl4O4	426.042	251.6277738	-0.16104	3.127015195	786.8438721	2.024074719	0.28
450	O=c1ccc(=O)c(c2OC)c1c(OC)c(c23)c(OC)c(=O)c(=O)c3OC	C18H14O8	358.307	299.1959409	-0.16111	3.128356172	935.9914685	2.146584191	0.2834
451	O=c1c(=O)c(OC)c(OC)c(c12)c(=O)c(=O)c3c2cccc3	C16H10O6	298.255	359.4373942	-0.1613	3.131995969	1125.75647	1.991353861	0.138
452	c1c(N)c(=O)c(=O)c(c12)cc(N)c(=O)c2=O	C10H6N2O4	218.17	491.378283	-0.16149	3.135635766	1540.783319	1.904702588	0.054
453	O=C1C(=O)C=C(Cl)C(Cl)=C1	C6H2Cl2O2	176.988	302.8566908	-0.16151	3.136018903	949.7643071	1.460418086	0.0594	http://zinc.docking.org/substances/ZINC000005187466/catitems/subsets/for-sale/table.html
454	COc(c1=O)c(OC)c(=O)c(c12)c(=O)ccc2=O	C12H8O6	248.194	431.9363079	-0.16156	3.136976744	1354.974153	2.034431177	0.144
455	COc1c(=O)c(=O)c(OC)c(c12)c(OC)cc(=O)c2=O	C13H10O7	278.22	385.320969	-0.16173	3.140233404	1209.997778	2.148485623	0.2328
456	O=c1ccc(=O)c(c12)c(=O)c(N)c(c2=O)N	C10H6N2O4	218.17	491.378283	-0.16177	3.140999677	1543.419028	1.822322379	0.1261
457	COc1c(=O)c(=O)c(OC)c(c12)c(=O)c3c(c2=O)cccc3	C16H10O6	298.255	359.4373942	-0.16185	3.142532223	1129.543594	2.058939897	0.1118
458	Clc1ccc(Cl)c(c(=O)c2=O)c1c(c23)c(=O)c(=O)c4c3c(Cl)ccc4Cl	C18H4Cl4O4	426.042	251.6277738	-0.16202	3.145788884	791.5678537	2.032503798	0.1255
459	c1cccc(c12)cc=3c(c2)=CC(=O)C(=O)C3	C14H8O2	208.219	257.4308781	-0.16203	3.145980452	809.8725102	1.956046188	0.0373
460	O=c1c(C)c(C)c(=O)c(c12)c(=O)ccc2=O	C12H8O4	216.195	495.867157	-0.16206	3.146555157	1560.27336	1.972153336	0.1436
461	O=c1c(C)cc(=O)c(c12)c(=O)cc(C)c2=O	C12H8O4	216.195	495.867157	-0.16209	3.147129862	1560.558337	1.929960966	0.1418
462	O=c1c(C)cc(=O)c(c12)c(=O)c(C)cc2=O	C12H8O4	216.195	495.867157	-0.16218	3.148853976	1561.413269	2.029139126	0.1449
463	O=C1C(=O)C=C(Cl)C=C1Cl	C6H2Cl2O2	176.988	302.8566908	-0.16227	3.15057809	954.1736545	1.878542458	0.0754	http://zinc.docking.org/substances/ZINC000005133051/catitems/subsets/for-sale/table.html
464	O=c1c(=O)cc(N)c(c12)c(N)cc(=O)c2=O	C10H6N2O4	218.17	491.378283	-0.16293	3.163221595	1554.338396	2.136425994	0.5127
465	O=c1ccc(=O)c(c12)c(N)c(=O)c(=O)c2N	C10H6N2O4	218.17	491.378283	-0.16296	3.1637963	1554.620794	2.067773564	0.0562
466	C1C(=O)C(=O)C=c(c=12)ccc(Cl)c2	C10H5ClO2	192.603	278.3030379	-0.163	3.164562573	880.7073776	2.070132009	0.0453
467	O=c1ccc(=O)c(c12)cc(N)c(=O)c2=O	C10H5NO4	203.156	527.6930044	-0.16326	3.169543347	1672.545852	2.177340925	0.0617
468	O=c1c(Cl)c(Cl)c(=O)c(c12)cc3c(c2)c(=O)ccc3=O	C14H4Cl2O4	307.092	349.0940826	-0.16326	3.169543347	1106.468827	2.132312989	0.05
469	COc(c1=O)c(OC)c(=O)c(c12)cc(=O)c(=O)c2	C12H8O6	248.194	431.9363079	-0.16334	3.171075894	1369.702814	2.051038173	0.0497
470	Nc1c(=O)c(=O)c(N)c(c12)cc3c(c2)c(=O)ccc3=O	C14H8N2O4	268.231	399.6704333	-0.16369	3.177780782	1270.065022	2.028455324	0.044
471	O=C1C(Cl)=C(Cl)C(=O)C=C1Cl	C6HCl3O2	211.433	253.5176628	-0.16376	3.17912176	805.9635184	1.816161797	0.0842	http://zinc.docking.org/substances/ZINC000001593823/catitems/subsets/for-sale/table.html
472	O=C1C(=O)C(Cl)=CC=C1Cl	C6H2Cl2O2	176.988	302.8566908	-0.16388	3.181420579	963.5145087	1.496319322	0.0754	http://zinc.docking.org/substances/ZINC000005133037/catitems/subsets/for-sale/table.html
473	C1C(=O)C(=O)C=c(c=12)cccc2Cl	C10H5ClO2	192.603	278.3030379	-0.16406	3.184868808	886.3586646	1.96192318	0.0521
474	O=c1c(=O)cc(Cl)c(c12)cc3c(c2)c(=O)ccc3=O	C14H5ClO4	272.647	393.1970643	-0.16413	3.186209786	1252.808334	2.128123647	0.0474
475	Cc1cc(=O)c(=O)c(c12)c(=O)c3c(c2=O)cccc3	C15H8O4	252.229	425.026464	-0.16414	3.186401354	1354.3049	2.168921037	0.165
476	COc1c(=O)c(=O)c(OC)c(c12)c(=O)ccc2=O	C12H8O6	248.194	431.9363079	-0.16444	3.192148402	1378.804795	1.718809649	0.2976
477	COc(c1)c(OC)cc(c12)c3c(cc(=O)c(=O)c3)c4c2cc(=O)c(=O)c4	C20H12O6	348.315	307.7788783	-0.16466	3.196362903	983.772989	2.154354805	0.0544
478	O=c1c(=O)c(Cl)c(Cl)c(c12)c(Cl)c3c(c2Cl)c(=O)ccc3=O	C14H2Cl4O4	375.982	285.1306711	-0.16467	3.196554472	911.4357217	2.189410833	0.2729
479	O=c1c(=O)ccc(c12)cc3c(c2)ccc(=O)c3=O	C14H6O4	238.202	450.0549953	-0.1649	3.200960541	1440.608281	2.624511906	0.0443	http://zinc.docking.org/substances/ZINC000584614255/catitems/subsets/for-sale/table.html
480	O=c1ccc(=O)c(c12)c(=O)c3c(c2=O)c(Cl)ccc3Cl	C14H4Cl2O4	307.092	349.0940826	-0.165	3.202876224	1118.105137	2.097094539	0.1518	http://zinc.docking.org/substances/ZINC000039618133/catitems/subsets/for-sale/table.html
481	Cc1c(=O)c(=O)c(C)c(c12)c(=O)ccc2=O	C12H8O4	216.195	495.867157	-0.16502	3.203259361	1588.391112	1.943165105	0.0509
482	O=c1ccc(=O)c(c12)c(=O)c3c(c2=O)cccc3	C14H6O4	238.202	450.0549953	-0.16503	3.203450929	1441.729093	2.100737871	0.0632	http://zinc.docking.org/substances/ZINC000000397790/catitems/subsets/for-sale/table.html
483	c1c(=O)c(=O)cc(c1c23)c4c(cc(N)cc4)c2cc(=O)c(=O)c3	C18H9NO4	303.277	353.4854275	-0.16531	3.20881484	1134.269285	2.046040584	0.0485
484	COc1c(OC)c(=O)c(=O)c(c12)c(=O)ccc2=O	C12H8O6	248.194	431.9363079	-0.16541	3.210730522	1386.831088	1.979880402	0.1716
485	O=c1c(C)c(C)c(=O)c(c12)c(=O)c(=O)cc2C	C13H10O4	230.222	465.6548896	-0.16552	3.212837773	1496.073619	2.116223687	0.1359
486	Cc1c(C)c(=O)c(=O)c(c12)c(C)c(C)c(=O)c2=O	C14H12O4	244.249	438.9127489	-0.16578	3.217818548	1412.341584	2.023079372	0.6017
487	c1c(=O)c(=O)cc2c(OC)c(OC)c(c3c12)cc(=O)c(=O)c3	C16H10O6	298.255	359.4373942	-0.16583	3.218776389	1156.948598	1.989412047	0.1503
488	O=C1C(Cl)=C(Cl)C(Cl)=CC1=O	C6HCl3O2	211.433	253.5176628	-0.16595	3.221075208	816.5994585	1.928707926	0.0692
489	O=c1c(=O)c(Cl)cc(cc2Cl)c1c(c23)c(Cl)cc4c3c(=O)c(=O)c(Cl)c4	C18H4Cl4O4	426.042	251.6277738	-0.16597	3.221458345	810.6083917	2.114431218	0.8725
490	c1cccc(c1c2=3)c(Cl)cc2=C(Cl)C(=O)C(=O)C3Cl	C14H5Cl3O2	311.554	172.0472213	-0.16601	3.222224618	554.3747919	2.12732533	0.8748
491	Clc1ccc(Cl)c(c1c23)c(=O)c(=O)c2c(=O)ccc3=O	C14H4Cl2O4	307.092	349.0940826	-0.16605	3.222990891	1125.127048	2.189472043	0.1367
492	COc1ccc(OC)c(c12)c(=O)c3c(c2=O)cc(=O)c(=O)c3	C16H10O6	298.255	359.4373942	-0.16609	3.223757164	1158.738875	2.065955246	0.078
493	O=c1c(=O)cc(OC)c(c12)c(OC)cc(=O)c2=O	C12H8O6	248.194	431.9363079	-0.1668	3.23735851	1398.332682	2.071234376	0.0722
494	O=C1C(Cl)=C(Cl)C(=O)C(Cl)=C1Cl	C6Cl4O2	245.878	218.002424	-0.16713	3.243680263	707.1301599	1.669181355	0.0902	http://zinc.docking.org/substances/ZINC000000240941/catitems/subsets/for-sale/table.html
495	COc1c(=O)c(=O)c(OC)c(c12)cc3c(c2)c(=O)ccc3=O	C16H10O6	298.255	359.4373942	-0.16731	3.247128491	1167.139403	2.135838112	0.0759
496	O=C1C(=O)C(Cl)=CC(Cl)=C1Cl	C6HCl3O2	211.433	253.5176628	-0.16749	3.25057672	824.0786127	1.976487287	0.0747
497	c1c(=O)c(=O)cc(c(C)c2C)c1c(c23)cc(=O)c(=O)c3	C16H10O4	266.256	402.635058	-0.16792	3.258814155	1312.112826	2.079696554	0.0615
498	C1C(=O)C(=O)C=c(c=12)cc(Cl)c(Cl)c2	C10H4Cl2O2	227.048	236.0822381	-0.16793	3.259005723	769.3933651	2.126508668	0.0456
499	c1c(Cl)c(Cl)cc(c2=O)c1c(=O)c(c23)c(=O)c4c(c3=O)cc(Cl)c(Cl)c4	C18H4Cl4O4	426.042	251.6277738	-0.16825	3.265135907	821.5988795	2.093534104	0.1557
500	O=c1c(=O)ccc(c12)c(=O)c(N)c(c2=O)N	C10H6N2O4	218.17	491.378283	-0.16834	3.266860022	1605.264068	2.065786978	0.102
501	Cc(c1)c(C)cc(c12)c3c(cc(=O)c(=O)c3)c4c2cc(=O)c(=O)c4	C20H12O4	316.316	338.9142503	-0.16852	3.27030825	1108.354069	1.848767643	0.0531
502	COc1cc(=O)c(=O)c(c12)c(OC)cc(=O)c2=O	C12H8O6	248.194	431.9363079	-0.1686	3.271840796	1413.226834	2.022095635	0.5785
503	Cc1c(C)c(=O)c(=O)c(c12)cc(=O)c(=O)c2	C12H8O4	216.195	495.867157	-0.16863	3.272415501	1622.683371	2.192285621	0.0738
504	O=c1c(C)c(C)c(=O)c(c12)cc(=O)c(=O)c2	C12H8O4	216.195	495.867157	-0.16869	3.27356491	1623.253325	1.945681723	0.0453
505	c1c(=O)c(=O)cc(c1c23)c(N)cc2c(=O)c(=O)c(c3)N	C14H8N2O4	268.231	399.6704333	-0.16904	3.280269799	1311.026852	2.128260908	0.0392
506	COc(c1)c(=O)c(=O)c(c12)cc(c(=O)c2=O)OC	C12H8O6	248.194	431.9363079	-0.16951	3.289273507	1420.756654	1.946118128	0.0543
507	O=c1c(Cl)c(Cl)c(=O)c(c12)c(=O)c3c(c2=O)cccc3	C14H4Cl2O4	307.092	349.0940826	-0.16963	3.291572327	1149.068422	2.048503097	0.1789
508	Cc1cc(=O)c(=O)c(c12)c(=O)c(=O)cc2C	C12H8O4	216.195	495.867157	-0.16983	3.295403692	1634.08246	2.035739333	0.1706
509	O=c1c(=O)c(N)c(N)c(c12)c(=O)c(=O)c(N)c2N	C10H8N4O4	248.2	431.9258662	-0.16983	3.295403692	1423.370094	1.985161831	0.6606
510	c1c(=O)c(=O)cc(cc2C)c1c(c23)cc(=O)c(=O)c3	C15H8O4	252.229	425.026464	-0.17005	3.299618193	1402.425053	1.961321722	0.0635
511	COc(c1=O)cc(=O)c(c12)cc(=O)c(=O)c2	C11H6O5	218.167	491.3850399	-0.17022	3.302874854	1622.983292	2.131220001	0.0525
512	c1c(Cl)c(=O)c(=O)c(c1c23)ccc2c(=O)c(=O)c(Cl)c3	C14H4Cl2O4	307.092	349.0940826	-0.1704	3.306323082	1154.217823	2.167811698	0.0469
513	O=c1c(Cl)c(Cl)c(=O)c(c12)cc3c(c2)c(=O)c(Cl)c(Cl)c3=O	C14H2Cl4O4	375.982	285.1306711	-0.17043	3.306897787	942.8979853	1.6711885	0.053
514	O=c1c(Cl)cc(=O)c(c12)c(=O)c3c(c2=O)c(Cl)ccc3Cl	C14H3Cl3O4	341.537	313.8869288	-0.17061	3.310346016	1039.074344	2.142261032	0.1957
515	C1C(=O)C(=O)C=c(c=12)c(Cl)ccc2Cl	C10H4Cl2O2	227.048	236.0822381	-0.1709	3.315901495	782.8254463	1.793274657	0.0465
516	c1cccc(c1=2)=C(Cl)C(=O)C(=O)C2Cl	C10H4Cl2O2	227.048	236.0822381	-0.17093	3.3164762	782.9611239	1.357263955	0.0546
517	c1c(=O)c(=O)cc(c12)c(=O)c3c(c2=O)cccc3	C14H6O4	238.202	450.0549953	-0.17105	3.318775019	1493.631276	2.174166161	0.0492
518	O=C1C(=O)C(Cl)=C(Cl)C(Cl)=C1Cl	C6Cl4O2	245.878	218.002424	-0.17105	3.318775019	723.5009988	1.590050681	0.0704	http://zinc.docking.org/substances/ZINC000001595936/catitems/subsets/for-sale/table.html
519	O=c1c(=O)cc(OC)c(c12)c(=O)ccc2=O	C11H6O5	218.167	491.3850399	-0.17106	3.318966587	1630.890529	2.074090635	0.0741
520	c1c(=O)c(=O)cc(c(c2)N)c1c(c23)cc(N)c4c3cc(=O)c(=O)c4	C18H10N2O4	318.291	336.8112828	-0.17106	3.318966587	1117.865394	1.973061587	0.7001
521	O=c1c(=O)c(C)cc(c12)cc(C)c(=O)c2=O	C12H8O4	216.195	495.867157	-0.17108	3.319349724	1645.956511	2.024542048	0.0622
522	O=c1c(Cl)c(Cl)c(=O)c(c12)c(=O)c(=O)c3c2cccc3	C14H4Cl2O4	307.092	349.0940826	-0.17128	3.323181089	1160.102853	2.135928358	0.1826
523	O=c1c(=O)cc(OC)c(c12)cc(=O)c(=O)c2	C11H6O5	218.167	491.3850399	-0.17129	3.323372657	1633.055606	2.12782223	0.0561
524	O=c1c(C)c(C)c(=O)c(c12)ccc(=O)c2=O	C12H8O4	216.195	495.867157	-0.1713	3.323564225	1648.046343	2.138301241	0.0778
525	O=c1cc(N)c(=O)c(c12)ccc(=O)c2=O	C10H5NO4	203.156	527.6930044	-0.17132	3.323947362	1754.02377	2.055130854	0.0613
526	O=c1c(=O)cc(Cl)c(c12)cc3c(c2)c(=O)c(=O)cc3Cl	C14H4Cl2O4	307.092	349.0940826	-0.17179	3.33295107	1163.513496	2.076646674	0.0515
527	Cc1c(C)c(=O)c(=O)c(c12)c(=O)ccc2=O	C12H8O4	216.195	495.867157	-0.17199	3.336782435	1654.60082	2.149283831	0.0619
528	O=c1c(C)cc(=O)c(c12)cc(=O)c(=O)c2	C11H6O4	202.168	530.2718531	-0.17215	3.339847527	1771.027137	2.140234063	0.0495
529	c1c(=O)c(=O)cc(c1c23)c(C)cc3cc(C)c(=O)c2=O	C16H10O4	266.256	402.635058	-0.17221	3.340996937	1345.202495	2.060044295	0.0431
530	Clc1c(Cl)c(=O)c(=O)c(c12)c(=O)c(=O)c3c2cccc3	C14H4Cl2O4	307.092	349.0940826	-0.17252	3.346935553	1168.395396	2.129635381	0.6468
531	O=c1c(=O)cc(Cl)c(c12)cc3c(c2)c(Cl)cc(=O)c3=O	C14H4Cl2O4	307.092	349.0940826	-0.17276	3.351533191	1170.000404	2.076646674	0.0441
532	Cc1cc(=O)c(=O)c(c12)c(=O)c(C)cc2=O	C12H8O4	216.195	495.867157	-0.17277	3.351724759	1662.010227	2.096774422	0.0761
533	c1c(=O)c(=O)cc(c12)c(N)cc(=O)c2=O	C10H5NO4	203.156	527.6930044	-0.17298	3.355747692	1770.804582	2.067807755	0.0718
534	c1c(=O)c(=O)cc(c1c23)c(C)cc3cc(C)c4c2cc(=O)c(=O)c4	C20H12O4	316.316	338.9142503	-0.17304	3.356897102	1137.700265	2.017712625	1.0349
535	c1c(=O)c(=O)cc(c(c2)OC)c1c(c23)cc(OC)c4c3cc(=O)c(=O)c4	C20H12O6	348.315	307.7788783	-0.17315	3.359004353	1033.830592	2.063540464	0.0409
536	O=c1c(Cl)c(Cl)c(=O)c(c12)c(=O)c3c(c2=O)c(Cl)ccc3Cl	C14H2Cl4O4	375.982	285.1306711	-0.17321	3.360153762	958.0828972	2.147099491	0.173
537	Clc1c(=O)c(=O)c(Cl)c(c12)c3c(c(Cl)ccc3Cl)c4c2c(=O)ccc4=O	C18H4Cl4O4	426.042	251.6277738	-0.17328	3.36149474	845.8454381	2.175861557	0.5152
538	ClC1C(=O)C(=O)C(Cl)=c(c=12)cc3c(c2)cccc3	C14H6Cl2O2	277.109	193.4329091	-0.17378	3.371073153	652.0764867	1.947132441	0.0447
539	O=c1ccc(=O)c(c12)c(=O)c3c(c2=O)cc(Cl)c(Cl)c3	C14H4Cl2O4	307.092	349.0940826	-0.17379	3.371264721	1176.888565	2.174358278	0.0633
540	O=c1c(=O)c(Cl)c(Cl)c(c12)c(=O)c3c(c2=O)cccc3	C14H4Cl2O4	307.092	349.0940826	-0.17387	3.372797267	1177.423568	2.182098659	0.152
541	COc1c(OC)c(=O)c(=O)c(c12)ccc(=O)c2=O	C12H8O6	248.194	431.9363079	-0.17429	3.380843134	1460.308901	2.093174617	0.1616
542	Cc1cc(=O)c(=O)c(c12)c(=O)ccc2=O	C11H6O4	202.168	530.2718531	-0.17432	3.381417839	1793.070703	2.173882946	0.5666
543	O=c1ccc(=O)c(c12)c(=O)ccc2=O	C10H4O4	188.141	569.8066875	-0.17432	3.381417839	1926.754498	1.550315878	0.0659
544	O=c1c(Cl)c(Cl)c(=O)c(c12)cc3c(c2)c(=O)c(=O)c(Cl)c3Cl	C14H2Cl4O4	375.982	285.1306711	-0.17446	3.384099794	964.9106454	2.053571163	0.0582
545	c1c(=O)c(=O)cc(c2N)c1c(N)c(c23)cc4c(c3)c(=O)ccc4=O	C18H10N2O4	318.291	336.8112828	-0.17457	3.386207045	1140.512739	2.087630869	0.0701
546	Clc1ccc(Cl)c(c12)c(=O)c3c(c2=O)cc(=O)c(=O)c3	C14H4Cl2O4	307.092	349.0940826	-0.17517	3.39770114	1186.117363	1.983271142	0.2114
547	O=c1cc(C)c(=O)c(c12)ccc(=O)c2=O	C11H6O4	202.168	530.2718531	-0.17527	3.399616823	1802.721113	2.161553765	0.0614
548	Clc1ccc(Cl)c(c1=2)=CC(=O)C(=O)C2Cl	C10H3Cl3O2	261.493	204.9844547	-0.17527	3.399616823	696.8686006	2.12603075	0.657
549	Clc1c(=O)c(=O)c(Cl)c(c12)c(=O)c(=O)c3c2cccc3	C14H4Cl2O4	307.092	349.0940826	-0.17529	3.399999959	1186.919867	2.057267849	0.178
550	Clc1c(=O)c(=O)c(Cl)c(c12)c(=O)c3c(c2=O)cc4c(c3)cccc4	C18H6Cl2O4	357.152	300.1635158	-0.17536	3.401340937	1020.958454	2.155869916	0.2175
551	c1c(=O)c(=O)cc(c2C)c1c(C)c(c23)cc4c(c3)c(=O)ccc4=O	C20H12O4	316.316	338.9142503	-0.17559	3.405747007	1154.256194	2.184028349	0.0408
552	c1c(Cl)ccc(c1=2)=C(Cl)C(=O)C(=O)C2Cl	C10H3Cl3O2	261.493	204.9844547	-0.17576	3.409003667	698.7927578	2.003569896	0.0528
553	c1c(=O)c(=O)cc(c12)c(=O)ccc2=O	C10H4O4	188.141	569.8066875	-0.1759	3.411685623	1944.001284	2.078369567	0.046
554	Clc1cccc(c1=2)=C(Cl)C(=O)C(=O)C2Cl	C10H3Cl3O2	261.493	204.9844547	-0.17598	3.413218169	699.6566652	1.793568906	0.6489
555	Cc(c1)c(=O)c(=O)c(c12)cc(C)c(=O)c2=O	C12H8O4	216.195	495.867157	-0.17648	3.422796582	1697.25241	1.921706862	0.0557
556	O=c1c(=O)c(Cl)c(Cl)c(c12)c(=O)c(=O)c3c2cccc3	C14H4Cl2O4	307.092	349.0940826	-0.17655	3.42413756	1195.34616	2.166383867	0.158
557	C1C(=O)C(=O)C=c(c=12)c(Cl)c(Cl)c(Cl)c2Cl	C10H2Cl4O2	295.938	181.1257763	-0.17659	3.424903833	620.3383655	1.932136951	0.0454
558	c1c(=O)c(=O)cc(c1c23)cc(Cl)c2cc(=O)c(=O)c3	C14H5ClO4	272.647	393.1970643	-0.17672	3.42739422	1347.641346	2.105619842	0.0624
559	O=c1c(=O)cc(N)c(c12)c(=O)c(=O)cc2N	C10H6N2O4	218.17	491.378283	-0.17684	3.429693039	1685.276677	1.909229635	0.0946
560	c1c(=O)c(=O)cc(c1c23)c4c(cc(Cl)cc4)c2cc(=O)c(=O)c3	C18H7ClO4	322.707	332.2022764	-0.17687	3.430267744	1139.542753	2.111761105	0.048
561	O=c1ccc(=O)c(c12)c(N)cc(=O)c2=O	C10H5NO4	203.156	527.6930044	-0.17696	3.431991858	1811.038095	2.009154868	0.0649
562	c1cccc(c2Cl)c1c(Cl)c(c23)c(=O)c4c(c3=O)c(Cl)c(=O)c(=O)c4Cl	C18H4Cl4O4	426.042	251.6277738	-0.17715	3.435631655	864.500345	1.997214621	0.1702
563	c1c(=O)c(=O)cc(c2OC)c1c(OC)c(c23)cc4c(c3)c(=O)ccc4=O	C20H12O6	348.315	307.7788783	-0.17717	3.436014792	1057.532778	2.18223736	0.0463
564	COc1cc(=O)c(=O)c(c12)ccc(=O)c2=O	C11H6O5	218.167	491.3850399	-0.17746	3.441570271	1691.136145	2.147389841	0.0615
565	c1c(=O)c(=O)cc(c(C)c2)c1c(cc3C)c2c(c34)cc(=O)c(=O)c4	C20H12O4	316.316	338.9142503	-0.17753	3.442911249	1166.851685	1.792783813	0.0351
566	Clc1c(=O)c(=O)c(Cl)c(c1c23)ccc2c(Cl)c(=O)c(=O)c3Cl	C14H2Cl4O4	375.982	285.1306711	-0.17756	3.443485954	981.8434609	2.177760598	0.7418
567	O=c1c(=O)c(Cl)c(Cl)c(c12)cc3c(c2)c(=O)c(=O)c(Cl)c3Cl	C14H2Cl4O4	375.982	285.1306711	-0.17761	3.444443795	982.1165708	2.049721982	0.053
568	ClC1C(=O)C(=O)C(Cl)=c(c=12)cc3c(c2Cl)cccc3	C14H5Cl3O2	311.554	172.0472213	-0.17807	3.453255935	594.123088	2.161153196	0.1404
569	Clc1ccc(Cl)c(c1c23)c(=O)c(=O)c2c(Cl)c(=O)c(=O)c3Cl	C14H2Cl4O4	375.982	285.1306711	-0.17809	3.453639071	984.7384261	2.145146483	0.8875
570	Clc1c(=O)c(=O)c(Cl)c(c12)c(=O)c3c(c2=O)cccc3	C14H4Cl2O4	307.092	349.0940826	-0.17835	3.458619846	1207.383722	1.857318533	0.1637
571	c12c3c4c(Cl)c(=O)c(=O)c3ccc2c(=O)c(=O)c(Cl)c1c(Cl)c4Cl	C16H2Cl4O4	400.004	268.0073199	-0.17886	3.468389827	929.5538619	2.162341661	0.1741
572	O=c1c(=O)c(Cl)c(Cl)c(c12)cc3c(c2)c(Cl)c(Cl)c(=O)c3=O	C14H2Cl4O4	375.982	285.1306711	-0.17892	3.469539236	989.2720509	2.049721982	0.0457
573	ClC1C(=O)C(=O)C(Cl)=c(c=12)ccc(Cl)c2Cl	C10H2Cl4O2	295.938	181.1257763	-0.17906	3.472221192	628.9087589	1.962260381	0.6479
574	O=c1ccc(=O)c(c12)ccc(=O)c2=O	C10H4O4	188.141	569.8066875	-0.17911	3.473179033	1979.04064	1.904833517	0.0615	http://zinc.docking.org/substances/ZINC000003845653/catitems/subsets/for-sale/table.html
575	ClC1C(=O)C(=O)C(Cl)=c(c=12)c(Cl)c3c(c2Cl)cccc3	C14H4Cl4O2	345.999	154.9195229	-0.17915	3.473945306	538.1819494	2.055424859	0.5395
576	c1c(=O)c(=O)cc(c1c23)c4c(cc(Cl)c(Cl)c4)c2cc(=O)c(=O)c3	C18H6Cl2O4	357.152	300.1635158	-0.17949	3.480458627	1044.706698	1.692347185	0.0501
577	c1c(Cl)c(Cl)cc(c1=2)=C(Cl)C(=O)C(=O)C2Cl	C10H2Cl4O2	295.938	181.1257763	-0.17987	3.487738221	631.7192928	1.80184837	0.0533
578	O=c1ccc(=O)c(c12)c(=O)cc(Cl)c2=O	C10H3ClO4	222.586	481.6295724	-0.18002	3.490611745	1681.181842	2.007536796	0.0673
579	c1c(=O)c(=O)cc(c1c23)c(Cl)c(Cl)c2cc(=O)c(=O)c3	C14H4Cl2O4	307.092	349.0940826	-0.18002	3.490611745	1218.551905	2.004149694	0.059
580	c1c(=O)c(=O)cc(c12)c(=O)cc(Cl)c2=O	C10H3ClO4	222.586	481.6295724	-0.18037	3.497316633	1684.411115	2.155601144	0.0462
581	Cc1cc(=O)c(=O)c(c12)c(C)cc(=O)c2=O	C12H8O4	216.195	495.867157	-0.18076	3.504787795	1737.90916	1.905464307	0.0925
582	Clc1ccc(Cl)c(c1=2)=C(Cl)C(=O)C(=O)C2Cl	C10H2Cl4O2	295.938	181.1257763	-0.18078	3.505170932	634.8768061	1.811143571	0.1654
583	c1c(=O)c(=O)cc(c12)c(Cl)cc(=O)c2=O	C10H3ClO4	222.586	481.6295724	-0.1814	3.517048164	1693.914403	2.115937929	0.0767
584	O=c1c(=O)ccc(c12)ccc(=O)c2=O	C10H4O4	188.141	569.8066875	-0.18228	3.53390617	2013.643369	2.146267328	0.0605
585	Clc1c(=O)c(=O)c(Cl)c(c12)c(=O)c3c(c2=O)c(Cl)ccc3Cl	C14H2Cl4O4	375.982	285.1306711	-0.18233	3.534864012	1007.898148	2.084759478	0.3521
586	Clc1ccc(Cl)c(c12)cc=3c(c2)=C(Cl)C(=O)C(=O)C3Cl	C14H4Cl4O2	345.999	154.9195229	-0.18244	3.536971262	547.9459005	2.07523721	0.0445
587	c1c(=O)c(=O)cc(c12)c(=O)c(Cl)c(Cl)c2=O	C10H2Cl2O4	257.031	417.0858768	-0.18294	3.546549675	1479.215781	1.840876011	0.0457
588	Clc1c(=O)c(=O)c(Cl)c(c12)c(=O)ccc2=O	C10H2Cl2O4	257.031	417.0858768	-0.18302	3.548082221	1479.854984	1.694217565	0.056
589	O=c1ccc(=O)c(c12)c(=O)c(Cl)c(Cl)c2=O	C10H2Cl2O4	257.031	417.0858768	-0.1833	3.553446132	1482.092196	1.840103686	0.0682	http://zinc.docking.org/substances/ZINC000006091618/catitems/subsets/for-sale/table.html
590	c1c(=O)c(=O)cc(c12)c(Cl)c(Cl)c(=O)c2=O	C10H2Cl2O4	257.031	417.0858768	-0.18356	3.558426907	1484.169607	1.983039836	0.0713
591	O=c1c(=O)ccc(c12)c(=O)c(=O)cc2N	C10H5NO4	203.156	527.6930044	-0.18358	3.558810044	1877.959164	2.049688992	0.1128
592	Clc1c(=O)c(=O)c(Cl)c(c12)c(=O)c3c(c2=O)c(Cl)cc(Cl)c3	C14H2Cl4O4	375.982	285.1306711	-0.18407	3.568196888	1017.402373	2.026698473	0.2562
593	O=c1ccc(=O)c(c12)cc(Cl)c(=O)c2=O	C10H3ClO4	222.586	481.6295724	-0.18417	3.570112571	1719.471791	2.086379333	0.0643
594	O=c1c(Cl)cc(=O)c(c12)ccc(=O)c2=O	C10H3ClO4	222.586	481.6295724	-0.18421	3.570878844	1719.840851	1.950148115	0.0618
595	c1cccc(c2=O)c1c(=O)c(c23)cc4c(c3)c(Cl)c(=O)c(=O)c4Cl	C18H6Cl2O4	357.152	300.1635158	-0.1848	3.582181371	1075.240155	2.146277745	0.0388
596	Clc1c(=O)c(=O)c(Cl)c(c12)c(=O)c3c(c2=O)cc(Cl)c(Cl)c3	C14H2Cl4O4	375.982	285.1306711	-0.1849	3.584097053	1021.935998	2.011931482	0.1369
597	O=c1cc(Cl)c(=O)c(c12)ccc(=O)c2=O	C10H3ClO4	222.586	481.6295724	-0.18501	3.586204304	1727.222046	2.193610659	0.0623
598	O=c1ccc(=O)c(c12)c(Cl)cc(=O)c2=O	C10H3ClO4	222.586	481.6295724	-0.18518	3.589460965	1728.79055	1.836788054	0.0603
599	O=c1c(Cl)cc(=O)c(c12)c(=O)cc(Cl)c2=O	C10H2Cl2O4	257.031	417.0858768	-0.18529	3.591568215	1497.992378	1.835371865	0.0682
600	O=c1cc(Cl)c(=O)c(c12)c(=O)cc(Cl)c2=O	C10H2Cl2O4	257.031	417.0858768	-0.18529	3.591568215	1497.992378	1.808112964	0.0681
601	c1cc(=O)c(=O)c(c12)ccc(=O)c2=O	C10H4O4	188.141	569.8066875	-0.18614	3.607851517	2055.777922	2.008012457	0.0539
602	O=c1ccc(=O)c(c1c23)c(Cl)c(Cl)c2c(Cl)c(=O)c(=O)c3Cl	C14H2Cl4O4	375.982	285.1306711	-0.18673	3.619154044	1031.931821	2.101138004	0.6472
603	Clc1c(=O)c(=O)c(Cl)c(c12)c(=O)cc(Cl)c2=O	C10HCl3O4	291.476	367.7970056	-0.18703	3.624901092	1333.227767	2.126728792	0.067
604	O=c1c(=O)cc(Cl)c(c12)c(Cl)cc(=O)c2=O	C10H2Cl2O4	257.031	417.0858768	-0.18745	3.632946959	1515.250868	1.685684426	0.2731
605	O=c1ccc(=O)c(c12)c(Cl)c(Cl)c(=O)c2=O	C10H2Cl2O4	257.031	417.0858768	-0.18771	3.637927733	1517.328278	1.976130572	0.0612
606	Clc1c(Cl)c(=O)c(=O)c(c12)cc(=O)c(=O)c2Cl	C10HCl3O4	291.476	367.7970056	-0.18792	3.641950667	1339.49855	2.160059346	0.1185
607	Clc1c(=O)c(=O)c(Cl)c(c12)c(Cl)c3c(c2Cl)c(=O)ccc3=O	C14H2Cl4O4	375.982	285.1306711	-0.1881	3.645398895	1039.415033	2.039256025	0.5843
608	O=c1c(=O)ccc(c12)c(=O)c(Cl)c(Cl)c2=O	C10H2Cl2O4	257.031	417.0858768	-0.1881	3.645398895	1520.444395	2.002291811	0.0621
609	O=c1c(=O)ccc(c12)c(Cl)cc(=O)c2=O	C10H3ClO4	222.586	481.6295724	-0.18813	3.6459736	1756.008706	2.027751154	0.0687
610	O=c1c(Cl)cc(=O)c(c12)c(=O)c(Cl)c(Cl)c2=O	C10HCl3O4	291.476	367.7970056	-0.18865	3.655935149	1344.642001	1.970313232	0.0688
611	c1c(=O)c(=O)cc(c2Cl)c1c(Cl)c(c23)cc4c(c3)c(=O)ccc4=O	C18H6Cl2O4	357.152	300.1635158	-0.18867	3.656318286	1097.493352	2.051045959	0.0336
612	O=c1c(Cl)cc(=O)c(c12)cc(Cl)c(=O)c2=O	C10H2Cl2O4	257.031	417.0858768	-0.18873	3.657467695	1525.478121	1.965368	0.0645
613	Clc1c(=O)c(=O)c(Cl)c(c12)c(Cl)cc(=O)c2=O	C10HCl3O4	291.476	367.7970056	-0.18906	3.663789448	1347.530788	1.943732449	0.13
614	Clc1c(=O)c(=O)c(Cl)c(c12)cc3c(c2)c(=O)ccc3=O	C14H4Cl2O4	307.092	349.0940826	-0.18907	3.663981016	1279.074092	2.127114259	0.0434
615	O=c1c(=O)cc(Cl)c(c12)c(Cl)c(Cl)c(=O)c2=O	C10HCl3O4	291.476	367.7970056	-0.18949	3.672026883	1350.560492	2.020696913	0.217
616	Clc1c(=O)c(=O)c(Cl)c(c12)c(=O)c(Cl)c(Cl)c2=O	C10Cl4O4	325.921	328.9263349	-0.18949	3.672026883	1207.826344	1.565804877	0.1155
617	Clc1cc(=O)c(=O)c(c12)c(Cl)cc(=O)c2=O	C10H2Cl2O4	257.031	417.0858768	-0.18992	3.680264318	1534.98627	1.733384529	0.1429
618	O=c1c(Cl)cc(=O)c(c12)c(Cl)cc(=O)c2=O	C10H2Cl2O4	257.031	417.0858768	-0.19006	3.682946274	1536.104876	1.929580523	0.0723
619	c1c(=O)c(=O)cc(c(Cl)c2)c1c(c23)cc(Cl)c4c3cc(=O)c(=O)c4	C18H6Cl2O4	357.152	300.1635158	-0.19006	3.682946274	1105.486102	1.783592779	0.0342
620	Clc1c(=O)c(=O)c(Cl)c(c12)c(Cl)c(Cl)c(=O)c2=O	C10Cl4O4	325.921	328.9263349	-0.19024	3.686394502	1212.552233	1.73191787	0.6634
621	O=c1cc(Cl)c(=O)c(c12)c(Cl)cc(=O)c2=O	C10H2Cl2O4	257.031	417.0858768	-0.19043	3.690034299	1539.061191	1.89483297	0.0624
622	O=c1c(=O)ccc(c12)c(Cl)c(Cl)c(=O)c2=O	C10H2Cl2O4	257.031	417.0858768	-0.1906	3.693290959	1540.419498	2.126957315	0.0589
623	O=c1c(=O)c(Cl)c(Cl)c(c12)c(Cl)c(Cl)c(=O)c2=O	C10Cl4O4	325.921	328.9263349	-0.19128	3.706317601	1219.105464	1.620815437	0.3107
624	Clc1cc(=O)c(=O)c(c12)ccc(=O)c2=O	C10H3ClO4	222.586	481.6295724	-0.19129	3.706509169	1785.164426	2.055825474	0.0587
625	O=c1c(Cl)c(Cl)c(=O)c(c12)c(=O)c(Cl)c(Cl)c2=O	C10Cl4O4	325.921	328.9263349	-0.19205	3.721068356	1223.957376	1.703955967	0.0696
626	O=c1c(Cl)c(Cl)c(=O)c(c12)cc(Cl)c(=O)c2=O	C10HCl3O4	291.476	367.7970056	-0.1924	3.727773245	1371.063837	2.180851211	0.084
627	O=c1c(Cl)cc(=O)c(c12)c(Cl)c(Cl)c(=O)c2=O	C10HCl3O4	291.476	367.7970056	-0.19248	3.729305791	1371.627503	2.049259701	0.0609
628	Clc1c(Cl)c(=O)c(=O)c(c12)c(=O)cc(Cl)c2=O	C10HCl3O4	291.476	367.7970056	-0.19276	3.734669703	1373.600334	2.067759984	0.0768
629	c1c(=O)c(=O)cc(c1c23)c(Cl)cc2c(=O)c(=O)c(Cl)c3	C14H4Cl2O4	307.092	349.0940826	-0.19285	3.736393817	1304.352972	1.960406705	0.0641
630	O=c1c(Cl)c(Cl)c(=O)c(c12)cc3c(c2)c(Cl)c4c(c3Cl)cc(=O)c(=O)c4	C18H4Cl4O4	426.042	251.6277738	-0.19353	3.749420458	943.458323	2.12440057	0.0338
631	O=c1c(=O)cc(Cl)c(c12)c(=O)c(Cl)c(Cl)c2=O	C10HCl3O4	291.476	367.7970056	-0.19355	3.749803595	1379.166534	1.908606485	0.0745
632	Clc1c(Cl)c(=O)c(=O)c(c12)ccc(=O)c2=O	C10H2Cl2O4	257.031	417.0858768	-0.19407	3.759765144	1568.144942	2.117744056	0.6965
633	Clc1c(Cl)c(=O)c(=O)c(c12)c(Cl)c(Cl)c(=O)c2=O	C10Cl4O4	325.921	328.9263349	-0.19416	3.761489258	1237.252876	1.800351305	0.1578
634	O=c1c(=O)c(Cl)c(Cl)c(c12)cc3c(c2)c(Cl)c(=O)c(=O)c3Cl	C14H2Cl4O4	375.982	285.1306711	-0.1945	3.768002579	1074.373104	2.071591204	0.0432
635	O=c1c(Cl)c(Cl)c(=O)c(c12)cc3c(c2)c(Cl)c(=O)c(=O)c3Cl	C14H2Cl4O4	375.982	285.1306711	-0.1946	3.769918262	1074.919324	1.929529549	0.0428
636	O=c1c(=O)c(Cl)cc(c12)c(Cl)c(Cl)c(=O)c2=O	C10HCl3O4	291.476	367.7970056	-0.19473	3.772408649	1387.480605	2.143216042	0.0606
637	O=c1c(Cl)c(Cl)c(=O)c(c12)c(Cl)c(Cl)c(=O)c2=O	C10Cl4O4	325.921	328.9263349	-0.19579	3.792714884	1247.523806	1.992899471	0.5636
638	c1c(Cl)c(=O)c(=O)c(c12)cc(Cl)c(=O)c2=O	C10H2Cl2O4	257.031	417.0858768	-0.19599	3.796546249	1583.485821	1.865022751	0.056
639	Clc1c(Cl)c(=O)c(=O)c(c12)c(Cl)cc(=O)c2=O	C10HCl3O4	291.476	367.7970056	-0.19855	3.845587723	1414.395649	2.13771106	0.0577
640	c12c3c4c(=O)c(=O)cc3cc(Cl)c1c(=O)c(=O)cc2cc4Cl	C16H4Cl2O4	331.114	323.767645	-0.2008	3.88869058	1259.032191	2.099850109	0.0362
641	c12c3c4c(Cl)c(=O)c(=O)c3cc(Cl)c1c(Cl)c(=O)c(=O)c2cc4Cl	C16H2Cl4O4	400.004	268.0073199	-0.20494	3.967999838	1063.453002	2.168871216	0.1233
